# Supplementary material
Source: publisher site journal article supplement (https://www.spandidos-publications.com/5751/downloadSupplementary)
Supplement: Supplementary file 1 [file downloadSupplementary]

## Sheet: P_min_0.0001
Data S1. Microarray data including top 50 differentially expressed genes under NFV treatment.
Name	Description	DMSO1_2	DMSO2_2	DMSO_3	NELFINAVIR_1	NELFINAVIR_2	NELFINAVIR_3	Avg_DMSO	Avg_Nelfinavir	Fold Change	T-test
209921_at	SLC7A11	654.258	690.037	694.149	5370.27	5273.36	5178.17	679.482	5273.93	7.7617	7.04266e-08
223196_s_at	SESN2	290.383	283.691	285.917	1930.88	2210.4	2055.4	286.664	2065.56	7.20552	1.26402e-05
217678_at	SLC7A11	463.891	477.864	469.62	3534.07	3149.39	3211.3	470.458	3298.25	7.01072	9.39923e-06
219270_at	CHAC1	221.766	209.044	195.283	1371.23	1359.01	1358.07	208.698	1362.77	6.52988	9.87744e-09
203438_at	STC2	260.196	231.504	229.857	1315.16	1385.01	1489.41	240.519	1396.53	5.80631	1.17354e-05
203439_s_at	STC2	189.191	181.998	176.917	867.22	999.094	973.112	182.702	946.475	5.18044	2.32535e-05
226267_at	JDP2	340.724	324.076	300.933	1562.91	1617.07	1609.9	321.911	1596.63	4.95984	2.0169e-07
202847_at	PIGC	559.778	555.363	568.732	2523.25	2821.45	2812.68	561.291	2719.13	4.84442	1.26159e-05
209822_s_at	VLDLR	290.423	306.73	293.007	1429.91	1365.9	1493.44	296.72	1429.75	4.81851	3.44719e-06
205047_s_at	ASNS	1277.88	1282.72	1363.87	5610.59	6322.16	6269.8	1308.16	6067.52	4.63821	1.62938e-05
219892_at	TM6SF1	218.695	228.79	241.253	941.996	1048.72	1047.65	229.579	1012.79	4.4115	1.31948e-05
231124_x_at	LY9	334.948	330.341	331.535	1288.04	1338.02	1373.29	332.275	1333.12	4.0121	1.12104e-06
220892_s_at	PSAT1	882.975	846.719	912.805	3328.5	3405.92	3356.98	880.833	3363.8	3.81889	6.05488e-08
210512_s_at	VEGFA	695.748	693.025	554.92	2137.96	2466.62	2356.44	647.898	2320.34	3.58133	4.92593e-05
203395_s_at	HES1	1001.6	1013.14	983.857	314.498	263.723	262.481	999.533	280.234	0.280365	1.4954e-06
223058_at	FAM107B	1121.96	1131.84	1020.13	3621.18	3911.17	3870.37	1091.31	3800.91	3.48288	4.96814e-06
224839_s_at	GPT2	205.614	221.314	211.719	686.763	736.48	758.566	212.882	727.27	3.4163	9.42333e-06
223059_s_at	FAM107B	774.373	830.265	723.982	2405.28	2464.61	2592.19	776.207	2487.36	3.20451	5.50037e-06
231894_at	---	364.956	359.869	348.43	1038.32	1197.7	1125.11	357.752	1120.38	3.13171	3.98727e-05
202770_s_at	CCNG2	649.53	670.685	553.721	1815.86	1876.17	1922.74	624.645	1871.59	2.99625	6.23358e-06
202769_at	CCNG2	1507.67	1453.45	1241.45	4027.86	4212.64	4325.57	1400.86	4188.69	2.99009	9.79275e-06
230075_at	RAB39B	481.085	523.6	492.733	1311.82	1493.93	1446.51	499.139	1417.42	2.83973	4.04906e-05
204774_at	EVI2A /// EVI2B	234.873	240.179	218.626	639.117	660.905	666.989	231.226	655.67	2.83562	1.18834e-06
201560_at	CLIC4	1672.85	1688.4	1612.17	4286.95	4910.88	4514.94	1657.81	4570.92	2.75721	4.62563e-05
217168_s_at	HERPUD1	1602.6	1646.32	1643.99	4267.53	4510.9	4509.93	1630.97	4429.45	2.71584	2.21999e-06
238695_s_at	RAB39B	273.703	294.89	289.041	722.848	789.067	687.531	285.878	733.149	2.56455	6.22844e-05
207076_s_at	ASS1	529.425	569.039	536.227	1286.87	1368.61	1420.32	544.897	1358.6	2.49332	1.8513e-05
203140_at	BCL6	218.816	228.035	226.626	538.587	578.09	559.238	224.493	558.638	2.48845	4.56828e-06
227755_at	---	555.924	577.763	523.246	1295.96	1482.48	1344.28	552.311	1374.24	2.48817	7.24247e-05
204411_at	KIF21B	740.287	750.097	689.886	1749.19	1799.51	1828.46	726.757	1792.38	2.46628	1.80958e-06
232231_at	RUNX2	635.745	652.471	708.396	1496.16	1700.47	1709.89	665.537	1635.51	2.45742	9.32404e-05
225295_at	SLC39A10	1044.61	1062.54	1080.58	513.584	369.003	426.449	1062.57	436.345	0.410649	6.63962e-05
35974_at	LRMP	642.491	648.417	568.347	1413.6	1593.48	1496.46	619.752	1501.18	2.42223	5.47069e-05
210279_at	GPR18	221.112	238.497	212.633	530.033	534.391	556.024	224.081	540.149	2.41051	4.47673e-06
202402_s_at	CARS	835.861	830.619	864.469	1963.14	2074.96	2048.91	843.649	2029.01	2.40503	2.36695e-06
232689_at	LOC284561	215.459	214.548	215.808	524.157	477.32	547.047	215.272	516.175	2.39778	6.29619e-05
223062_s_at	PSAT1	5396.02	5307.76	5392.88	12114.5	13114.9	13151.5	5365.55	12793.7	2.38441	1.31307e-05
201656_at	ITGA6	578.461	556.061	556.037	1307.23	1294.78	1381.14	563.519	1327.71	2.35611	5.33575e-06
211559_s_at	CCNG2	207.713	228.642	216.858	522.078	485.122	525.819	217.738	511.007	2.34689	1.68346e-05
204674_at	LRMP	859.56	864.399	806.351	1884.97	2080.71	1965.15	843.437	1976.95	2.34392	2.27802e-05
212593_s_at	PDCD4	1089.5	1070.35	1036.65	2330.44	2688.31	2449.36	1065.5	2489.37	2.33634	9.00096e-05
1553972_a_at	CBS	809.812	848.033	894.383	1914.06	1989.28	1988.2	850.743	1963.85	2.30839	2.87861e-06
202731_at	PDCD4	584.754	535.087	553.067	1203.8	1345	1294.72	557.636	1281.17	2.29751	3.93118e-05
240546_at	LOC389043	1133.97	1139.61	1089.46	557.005	418.906	488.321	1121.01	488.078	0.435391	6.14535e-05
203640_at	MBNL2	939.84	944.159	848.849	1953.42	2158.49	2099.67	910.949	2070.53	2.27293	3.55476e-05
213672_at	MARS	378.439	387.851	364.318	818.015	866.865	869.638	376.869	851.506	2.25942	6.29142e-06
205194_at	PSPH	1173.96	1162.65	1064.52	2376.31	2654.61	2527.84	1133.71	2519.59	2.22243	4.66975e-05
227347_x_at	HES4	2585.32	2798.43	2772.13	1403.16	1100.82	1207.71	2718.62	1237.23	0.455094	9.13378e-05
227336_at	DTX1	2966.34	2873.35	2822.84	1335.56	1396	1308.47	2887.51	1346.68	0.46638	3.13547e-06
225344_at	NCOA7	1442.32	1487.59	1452.74	3014.42	3281.77	3094.44	1460.88	3130.21	2.14268	1.58934e-05
201397_at	PHGDH	2784.94	2879.32	2950.46	5910.11	6239.53	6200.16	2871.57	6116.6	2.13005	4.59546e-06
234976_x_at	SLC4A5	592.729	620.872	610.8	1378.46	1209.03	1284.69	608.134	1290.73	2.12244	8.13431e-05
202730_s_at	PDCD4	609.012	597	598.827	1249.87	1310.92	1267.78	601.613	1276.19	2.12128	1.688e-06
211339_s_at	ITK	2307.41	2245.04	2226	4595.49	4930.27	4827.85	2259.48	4784.54	2.11754	7.91585e-06
211692_s_at	BBC3	270.244	271.265	256.626	520.86	565.759	589.466	266.045	558.695	2.1	7.21505e-05
228081_at	CCNG2	192.592	183.551	178.934	395.126	366.278	398.072	185.025	386.492	2.08886	2.52757e-05
212810_s_at	SLC1A4	736.777	791.74	760.942	1594.52	1592.57	1593.15	763.153	1593.41	2.08793	4.04093e-07
220924_s_at	SLC38A2	4399.72	4382.37	3798.8	8694.1	8728.45	8746.79	4193.63	8723.11	2.08009	1.08342e-05
209034_at	PNRC1	624.02	619.432	528.653	1160.64	1239.46	1259.11	590.702	1219.74	2.06489	6.49025e-05
223924_at	TTC25	168.685	172.207	172.843	330.136	376.968	351.5	171.245	352.868	2.06061	9.08462e-05
218041_x_at	SLC38A2	4459.71	4423.74	3906.02	8807.5	8768.52	8766.46	4263.16	8780.83	2.0597	7.37697e-06
212816_s_at	CBS	408.655	419.673	430.848	852.667	905.063	833.247	419.726	863.659	2.05768	1.90673e-05
238476_at	C5orf41	163.394	173.719	159.51	325.218	350.434	343.275	165.541	339.642	2.05171	1.77168e-05
235556_at	---	167.056	183.956	180.136	339.378	365.191	379.986	177.049	361.519	2.04191	6.99286e-05
1552275_s_at	PXK	292.186	323.936	294.122	601.416	621.347	635.167	303.415	619.31	2.04113	1.20754e-05
212971_at	CARS	4979.67	4864.91	5135.02	9918.68	10344.7	10290.2	4993.2	10184.5	2.03968	2.37309e-06
209369_at	ANXA3	137.153	159.67	145.245	292.984	297.65	307.149	147.356	299.261	2.03087	2.0424e-05
212594_at	PDCD4	479.952	432.925	440.189	883.998	968.745	879.524	451.022	910.756	2.01932	7.24581e-05
209102_s_at	HBP1	386.35	400.553	406.401	768.23	812.342	823.756	397.768	801.443	2.01485	1.15663e-05
225912_at	TP53INP1	194.541	206.89	209.822	412.519	392.294	421.989	203.751	408.934	2.00703	1.62063e-05
205653_at	CTSG	1921.24	1899.09	2086.27	3819.77	3923.24	4091.68	1968.87	3944.89	2.00364	1.84549e-05
203204_s_at	JMJD2A	391.244	405.468	371.463	741.022	769.964	825.939	389.392	778.975	2.00049	6.51458e-05
240983_s_at	CARS	258.047	287.1	281.44	562.592	529.235	555.826	275.529	549.218	1.99332	1.7564e-05
216620_s_at	ARHGEF10	1427.87	1370.63	1585.44	2803.04	2901.19	3002.38	1461.31	2902.21	1.98602	3.75878e-05
209610_s_at	SLC1A4	831.458	851.071	877.612	1722.89	1653.15	1708.38	853.38	1694.81	1.98599	2.36244e-06
205433_at	BCHE	1218.37	1191.7	1122.7	2246.47	2228.76	2470.18	1177.59	2315.14	1.96599	8.11374e-05
218603_at	HECA	1214.4	1204.55	1074.19	2174.67	2384.03	2296.22	1164.38	2284.97	1.9624	6.05238e-05
202687_s_at	TNFSF10	906.924	914.141	970.823	503.961	448.446	479.977	930.629	477.461	0.513052	3.09401e-05
202146_at	IFRD1	1506.24	1520.46	1568.13	3018.34	3022.49	2910.23	1531.61	2983.69	1.94808	1.94106e-06
212811_x_at	SLC1A4	726.21	706.978	735.607	1417.12	1317.36	1478.84	722.932	1404.44	1.9427	7.02339e-05
203279_at	EDEM1	4442.29	4561.15	4443.42	8313.14	8933.52	8700.04	4482.29	8648.9	1.92957	1.15454e-05
215111_s_at	TSC22D1	1119.7	1160.2	1100	2057.9	2288.75	2151.38	1126.63	2166.01	1.92255	5.77167e-05
201384_s_at	LOC100133166 /// NBR1	946.796	943.126	935.732	1689.21	1913.99	1823.42	941.885	1808.87	1.92048	9.34188e-05
227052_at	---	704.257	697.813	727.478	1316.93	1344.81	1415.01	709.849	1358.92	1.91438	1.44856e-05
222982_x_at	SLC38A2	6316.95	6312.75	5553.48	11205.2	11821.7	11678.1	6061.06	11568.3	1.90863	3.13357e-05
224928_at	SETD7	1913.98	1912.65	1888.8	3438.38	3722.42	3649.48	1905.14	3603.43	1.89142	1.9004e-05
228993_s_at	LOC92482	263.904	295.379	264.403	494.144	519.151	541.507	274.562	518.268	1.88762	7.18592e-05
202688_at	TNFSF10	1036.27	1092.73	1164.25	592.275	576.397	584.724	1097.75	584.465	0.53242	8.08941e-05
208869_s_at	GABARAPL1	258.023	273.713	257.393	482.16	525.536	474.088	263.043	493.928	1.87775	8.20342e-05
205264_at	CD3EAP	895.461	896.584	917.533	521.305	459.95	466.344	903.193	482.533	0.534253	1.74913e-05
226012_at	ANKRD11	1791.41	1820.54	1590.36	3209.17	3241.38	3259.4	1734.1	3236.65	1.86647	1.72183e-05
212614_at	ARID5B	1528.85	1607.69	1453.22	2861.98	2775.42	2901.54	1529.92	2846.31	1.86043	1.12381e-05
211458_s_at	GABARAPL1 /// GABARAPL3	587.411	570.711	545.323	1079.7	1079.38	997.083	567.815	1052.05	1.85281	4.35736e-05
228617_at	XAF1	987.511	1009.42	1030.68	1749.58	1943.09	1903.54	1009.2	1865.4	1.84839	7.15582e-05
201412_at	LRP10	591.637	613.362	584.064	1028.91	1154.24	1115.55	596.354	1099.57	1.84382	9.47331e-05
214452_at	BCAT1	379.049	398.077	381.204	704.586	696.26	731.612	386.11	710.819	1.84098	6.01867e-06
210432_s_at	SCN3A	877.746	898.34	945.582	1632.7	1645.26	1723.58	907.223	1667.18	1.83767	1.3021e-05
218667_at	PJA1	493.755	500.353	564.355	913.256	958.248	992.437	519.488	954.647	1.83767	8.60546e-05
233587_s_at	SIPA1L2	524.285	543.336	624.614	1007.78	1028.65	1062.57	564.078	1033	1.83131	8.63677e-05
208693_s_at	GARS	6030.58	6007.41	5983.18	10715.9	11171.4	11018.7	6007.06	10968.7	1.82597	1.61401e-06
221539_at	EIF4EBP1	898.257	897.809	885.711	1665.43	1595.73	1625.15	893.925	1628.77	1.82204	1.84876e-06
215930_s_at	CTAGE5	534.904	549.656	540.212	931.985	1028.26	996.669	541.591	985.637	1.81989	5.06473e-05
202842_s_at	OGFR	932.956	954.2	896.192	1623.98	1761.33	1675.38	927.782	1686.89	1.8182	3.16525e-05
204351_at	S100P	214.009	203.634	205.767	381.093	381.675	369.403	207.803	377.39	1.8161	2.43436e-06
215967_s_at	LY9	167.644	182.865	171.905	302.404	318.871	327.203	174.138	316.159	1.81557	3.90341e-05
224783_at	FAM100B	932.632	931.524	880.184	1581.43	1711.76	1683.03	914.78	1658.74	1.81327	3.32144e-05
200670_at	XBP1	1259.52	1329.75	1478.02	2463	2406.11	2504.89	1355.76	2458	1.813	4.88125e-05
202843_at	DNAJB9	299.314	319.769	308.502	545.124	578.601	556.402	309.195	560.042	1.81129	1.29587e-05
218473_s_at	GLT25D1	1520.83	1507.04	1552.3	936.719	774.971	822.166	1526.72	844.619	0.553223	8.2659e-05
243259_at	KIAA0664	817.2	869.72	831.948	1442.12	1596.18	1478.01	839.623	1505.44	1.79299	8.5581e-05
1557383_a_at	---	293.839	296.339	283.59	490.827	538.652	529.656	291.256	519.712	1.78438	5.68469e-05
201475_x_at	MARS	2457.7	2534.38	2585.34	4449.04	4587.75	4465.92	2525.81	4500.9	1.78197	2.11603e-06
212290_at	SLC7A1	903.792	1041.32	934.624	1670.01	1730.13	1726.47	959.911	1708.87	1.78024	4.15847e-05
225957_at	C5orf41	145.606	152.337	152.959	261.656	268.806	270.278	150.3	266.913	1.77587	2.57322e-06
213397_x_at	RNASE4	184.289	184.619	171.91	321.191	311.165	325.797	180.273	319.385	1.77167	1.03389e-05
212295_s_at	SLC7A1	4090.94	4034.38	3980.19	7098.32	7086.21	7196.13	4035.17	7126.89	1.76619	1.63489e-07
204285_s_at	PMAIP1	2658.71	2784.16	2528.58	4817.93	4509.94	4730.6	2657.15	4686.16	1.7636	3.31698e-05
220307_at	CD244	664.696	646.021	679.436	395.621	373.45	368.584	663.384	379.218	0.571642	1.2018e-05
238858_at	TIFA	323.912	332.384	315.033	536.64	583.949	577.217	323.776	565.935	1.74792	5.02942e-05
226444_at	---	463.773	489.468	428.805	767.04	820.824	822.951	460.682	803.605	1.74438	8.66937e-05
227679_at	---	246.767	240.293	243.985	418.74	433.735	421.728	243.682	424.735	1.74299	1.66944e-06
226497_s_at	---	719.829	659.497	645.467	1129.37	1221.45	1168.74	674.931	1173.19	1.73823	7.14789e-05
232181_at	LOC153346	825.753	841.56	774.627	491.88	449.224	464.712	813.98	468.605	0.575696	6.48701e-05
219889_at	FRAT1	415.768	409.573	400.07	719.682	686.994	716.103	408.47	707.593	1.7323	6.08019e-06
1557828_a_at	C5orf28	321.826	368.752	333.957	581.624	596.957	595.183	341.512	591.255	1.73129	3.68653e-05
201263_at	TARS	4700.53	4583.99	4730	7731.94	8518.4	8012.37	4671.51	8087.57	1.73126	6.44692e-05
213400_s_at	TBL1X	592.754	610.111	581.236	1050.87	986.283	1048.93	594.7	1028.7	1.72977	2.24887e-05
204695_at	CDC25A	2845.71	2931.45	2740.22	1760.69	1603.28	1585.65	2839.12	1649.87	0.58112	5.51961e-05
201329_s_at	ETS2	1518.78	1428.82	1411.57	893.351	818.673	824.815	1453.05	845.613	0.581955	6.01778e-05
201328_at	ETS2	3190.4	3204.21	3080.09	1932.27	1769.65	1816.3	3158.23	1839.41	0.582417	1.47077e-05
217783_s_at	YPEL5	380.877	386.667	397.157	682.855	669.057	643.575	388.234	665.162	1.7133	1.2102e-05
228176_at	S1PR3	1642.84	1729.09	1790.67	2926.46	2950.67	2961.96	1720.87	2946.36	1.71214	5.00135e-06
210365_at	RUNX1	218.342	223.956	234.181	377.957	390.843	388.733	225.493	385.844	1.71112	6.29208e-06
227037_at	PLD6	574.384	582.203	587.232	356.831	322.257	341.173	581.273	340.087	0.585073	1.13493e-05
227109_at	CYP2R1	1105.07	1033.23	1071.45	1798.76	1900.56	1785.23	1069.92	1828.19	1.70872	2.74074e-05
211742_s_at	EVI2B	215.944	211.628	203.795	374.195	342.036	359.564	210.456	358.598	1.70391	5.93276e-05
231935_at	ARPP-21	1620.98	1807.13	1809.62	2911.5	2893.28	3081.58	1745.91	2962.12	1.6966	7.45463e-05
227134_at	SYTL1	423.542	433.313	454.861	733.499	733.472	757.954	437.238	741.642	1.6962	7.99727e-06
208937_s_at	ID1	435.826	462.746	449.883	272.012	257.289	266.647	449.485	265.316	0.590267	1.60002e-05
227926_s_at	KIAA1245 /// NBPF1 /// NBPF10 /// NBPF11 /// NBPF14 /// NBPF15 /// NBPF16 /// NBPF20 /// NBPF8 /// NBPF9 /// XXyac-YX155B6.1	238.9	258.708	267.16	413.053	434.831	447.588	254.923	431.824	1.69394	8.71784e-05
226676_at	ZNF521	230.836	251.418	227.002	382.783	404.328	413.976	236.419	400.362	1.69345	8.14138e-05
210312_s_at	IFT20	880.86	890.26	916.714	1457.76	1573.71	1514.25	895.945	1515.24	1.69122	3.04846e-05
212787_at	YLPM1	2668.5	2629.45	2634.48	1636.22	1525.41	1533.49	2644.14	1565.04	0.59189	4.44063e-06
208671_at	SERINC1	2075.43	2094.98	2086.43	3414.25	3682.71	3453.8	2085.61	3516.92	1.68628	3.45701e-05
231944_at	ERO1LB	325.908	337.68	322.031	545.471	568.598	540.169	328.54	551.413	1.67838	1.15994e-05
221903_s_at	CYLD	486.349	507.093	492.644	827.872	828.305	832.865	495.362	829.681	1.6749	3.88226e-07
214677_x_at	IGL@	627.592	645.632	593.244	386.433	350.22	378.567	622.156	371.74	0.597503	9.36648e-05
212281_s_at	TMEM97	2876.98	2879.07	2873.06	1839.69	1653.77	1676.97	2876.37	1723.48	0.599185	1.95744e-05
219029_at	C5orf28	933.237	920.08	888.016	1560.12	1471.56	1538.35	913.778	1523.34	1.66708	1.69501e-05
221563_at	DUSP10	284.663	312.366	296.45	489.62	491.822	507.629	297.826	496.357	1.6666	1.77294e-05
236632_at	LOC646576	2076.58	2101.09	1929.86	3480.4	3299.5	3392.56	2035.84	3390.82	1.66556	2.7217e-05
226132_s_at	MANEAL	617.418	595.137	642.552	396.023	365.879	354.606	618.369	372.169	0.601856	9.11764e-05
221986_s_at	KLHL24	132.972	140.228	131.519	212.995	226.322	233.131	134.906	224.149	1.66152	8.14191e-05
228285_at	TDRD9	767.899	782.287	712.56	1211.01	1271.33	1275.64	754.249	1252.66	1.6608	3.73571e-05
204286_s_at	PMAIP1	3252.32	3214.56	2935.34	5199.27	5168.76	5184.34	3134.07	5184.12	1.65412	1.69514e-05
209238_at	STX3	320.508	320.706	339.114	550.481	522.118	544.048	326.776	538.883	1.64909	1.82127e-05
201195_s_at	SLC7A5	4679.47	4837.58	4945.34	8165.86	7558.82	8121.31	4820.8	7948.66	1.64883	5.92199e-05
239794_at	---	264.78	274.391	265.705	429.976	457.072	439.689	268.292	442.246	1.64837	1.6804e-05
226277_at	COL4A3BP	1251.15	1156.96	1089.81	1864.67	1960.24	1937.4	1165.97	1920.77	1.64736	8.13762e-05
214011_s_at	HSPC111	3957.82	4048.99	3825.54	2543.7	2263.44	2378.31	3944.12	2395.15	0.607271	5.92593e-05
223165_s_at	IHPK2	1091.66	1089.27	1216.83	1896.73	1831.39	1862.24	1132.59	1863.45	1.6453	4.6496e-05
238725_at	IRF1	831.696	823.125	798.762	522.425	469.951	498.969	817.861	497.115	0.607823	2.97914e-05
225524_at	ANTXR2	283.436	281.35	284.424	470.196	439.749	486.817	283.07	465.588	1.64478	9.47131e-05
222421_at	UBE2H	696.203	682.179	676.504	1143.68	1117.38	1115.94	684.962	1125.67	1.6434	1.0585e-06
225636_at	STAT2	630.865	601.676	696.814	1046.6	1037.62	1082.8	643.119	1055.68	1.6415	9.62294e-05
226150_at	PPAPDC1B	989.127	1010.55	1095.02	1657.07	1708.05	1710.98	1031.57	1692.04	1.64026	2.8198e-05
200924_s_at	LOC442497 /// SLC3A2	1914.63	1932.28	1941.98	3032.21	3338.39	3124.1	1929.63	3164.9	1.64016	8.5479e-05
238063_at	TMEM154	730.312	739.839	767.2	1184.37	1238.74	1245.72	745.784	1222.94	1.63981	1.41615e-05
202557_at	HSPA13	2546.29	2493.06	2325.33	3907.47	4153.58	4014.45	2454.89	4025.16	1.63965	4.34909e-05
209479_at	CCDC28A	1209.17	1265.64	1311.27	2066.72	2008.48	2123.54	1262.03	2066.24	1.63724	2.7423e-05
204569_at	ICK	459.411	459.845	439.87	716.552	755.555	752.35	453.042	741.486	1.63668	1.70052e-05
223168_at	RHOU	6288.11	6425.49	6372.03	3738.82	4209.5	3723.79	6361.88	3890.7	0.611565	5.70619e-05
228243_at	---	369.879	361.9	364.297	610.081	570.422	605.23	365.359	595.244	1.62921	2.74856e-05
203119_at	CCDC86	2798.67	2743.27	2915.1	1754.38	1717.09	1726.9	2819.01	1732.79	0.61468	1.53425e-05
200802_at	SARS	3214.27	3208.33	3460.18	5150.83	5397.04	5527.47	3294.26	5358.45	1.6266	5.8398e-05
224367_at	BEX2	1470.23	1491.49	1520.15	2365.55	2442.92	2473.36	1493.96	2427.28	1.62473	6.01095e-06
228780_at	---	161.495	167.856	164.847	273.578	253.379	275.623	164.733	267.527	1.62401	7.50912e-05
203023_at	HSPC111	2203.39	2286.22	2150.12	1372.88	1362.14	1358.65	2213.24	1364.56	0.616542	1.43395e-05
243918_at	CLIC5	183.252	180.231	181.405	305.13	279.839	298.37	181.629	294.446	1.62114	6.02933e-05
223310_x_at	PNPLA8	890.517	872.932	915.849	1404.29	1509.49	1425.17	893.099	1446.32	1.61943	4.41411e-05
221778_at	JHDM1D	359.202	378.19	364.383	584.327	588.587	609.024	367.258	593.98	1.61733	9.13299e-06
204923_at	SASH3	2965.63	3018.49	2964.11	1952.74	1688.9	1893.44	2982.74	1845.03	0.618567	7.78278e-05
221985_at	KLHL24	201.031	202.723	209.223	321.715	343.462	325.56	204.326	330.246	1.61627	3.05396e-05
235069_at	TATDN3	336.399	342.096	368.033	553.16	568.041	568.27	348.842	563.157	1.61436	2.00458e-05
224990_at	C4orf34	479.75	483.62	490.772	774.316	779.095	792.918	484.714	782.11	1.61355	6.59432e-07
225573_at	ACAD11 /// NPHP3	331.332	339.382	333.572	522.165	558.298	536.782	334.762	539.081	1.61034	2.26929e-05
228402_at	ZBED3	1324.45	1289.91	1195.55	2040.27	1970.18	2111.49	1269.97	2040.65	1.60685	8.13817e-05
1557236_at	APOL6	172.086	179.325	171.849	289.94	274.247	276.048	174.42	280.078	1.60577	2.21356e-05
226498_at	---	419.606	432.319	451.49	708.121	707.707	676.963	434.472	697.597	1.60562	2.27269e-05
229256_at	PGM2L1	532.929	563.888	491.524	858.371	839.762	845.886	529.447	848.006	1.60168	6.22515e-05
210732_s_at	LGALS8	222.619	216.233	231.473	361.492	362.896	347.562	223.442	357.317	1.59915	1.73744e-05
204495_s_at	C15orf39	984.482	988.11	1030.98	670.226	588.766	626.838	1001.19	628.61	0.627863	9.05116e-05
214283_at	TMEM97	1163.22	1189.27	1160.02	792.239	693.645	720.042	1170.83	735.309	0.628021	7.34255e-05
226530_at	BMF	305.261	291.342	326.652	480.394	500.078	487.297	307.752	489.256	1.58978	5.17146e-05
212279_at	TMEM97	1096.8	1175.62	1118.6	726.527	690.662	716.851	1130.34	711.347	0.629321	4.22175e-05
201761_at	MTHFD2	8346.38	8388.22	8272.06	12639.2	13554.3	13539.8	8335.55	13244.5	1.58891	4.33228e-05
203567_s_at	TRIM38	421.874	442.761	430.149	654.749	713.689	688.434	431.595	685.624	1.58858	7.51061e-05
212192_at	KCTD12	1031.87	1039.33	1037.18	686.83	624.196	646.313	1036.13	652.446	0.629696	1.58725e-05
227701_at	C10orf118	602.347	635.341	596.811	941.151	1002.33	969.786	611.5	971.088	1.58804	3.66015e-05
204297_at	PIK3C3	548.428	536.895	598.992	877.091	919.098	878.099	561.438	891.429	1.58776	7.53851e-05
206085_s_at	CTH	230.203	234.01	222.386	360.356	366.951	362.713	228.866	363.34	1.58756	2.17147e-06
242943_at	ST8SIA4	531.444	554.832	564.173	860.825	890.965	863.967	550.15	871.919	1.58487	9.59324e-06
226517_at	BCAT1	3607.17	3710.66	3532.42	5431.15	5834.23	5927.34	3616.75	5730.91	1.58455	9.66358e-05
227856_at	C4orf32	329.184	369.499	332.442	534.53	549.412	548.078	343.708	544.006	1.58276	6.50619e-05
226875_at	DOCK11	767.437	776.201	831.78	1234.27	1223.84	1300.68	791.806	1252.93	1.58237	6.24205e-05
200768_s_at	MAT2A	8295.2	8482.06	8343.95	5640.63	5003.32	5238.44	8373.74	5294.13	0.63223	4.63037e-05
236699_at	---	187.678	180.609	181.619	290.878	287.709	290.859	183.302	289.816	1.58108	8.30896e-07
211450_s_at	MSH6	607.634	608.058	594.843	413.797	361.372	370.926	603.511	382.032	0.633015	9.32613e-05
212486_s_at	FYN	433.347	483.844	477.88	731.545	728.712	742.948	465.024	734.402	1.57928	4.13412e-05
225168_at	FRMD4A	537.387	493.513	523.06	328.15	317.13	338.824	517.987	328.035	0.633288	9.42396e-05
220253_s_at	LRP12	611.295	636.893	590.483	930.962	1010.07	959.179	612.89	966.736	1.57734	9.44446e-05
240572_s_at	LOC374443	159.829	162.601	167.322	246.79	264.571	260.301	163.251	257.221	1.57562	4.21158e-05
228167_at	KLHL6	963.049	974.417	1005.07	1464.95	1599.25	1567.89	980.847	1544.03	1.57418	9.33568e-05
212434_at	GRPEL1	3688.74	3551.53	3527.42	2349.09	2211.8	2285.98	3589.23	2282.29	0.635872	1.69951e-05
207992_s_at	AMPD3	798.49	832.323	847.87	1303.87	1315.41	1274.47	826.228	1297.92	1.57089	7.81582e-06
48825_at	ING4	508.435	523.314	512.6	793.427	823.358	806.973	514.783	807.919	1.56944	3.60297e-06
203165_s_at	SLC33A1	496.809	486.597	501.331	758.457	787.872	781.659	494.912	775.996	1.56795	4.68166e-06
221827_at	RBCK1	2753.61	2946.59	2879.11	4279.31	4605.63	4553.62	2859.77	4479.52	1.56639	7.61514e-05
202911_at	MSH6	2836.63	2850.65	2809.59	1887.54	1775.64	1772.59	2832.29	1811.93	0.639739	6.7996e-06
219522_at	FJX1	360.939	386.711	376.778	249.685	232.233	237.568	374.809	239.829	0.639869	6.03801e-05
213713_s_at	GLB1L2	956.727	890.536	943.818	600.045	598.732	587.422	930.361	595.4	0.639967	4.2259e-05
229551_x_at	ZNF367	1877.89	1834.88	1822.18	1247.61	1137.77	1157.96	1844.98	1181.11	0.640176	3.06334e-05
218695_at	EXOSC4	1700.43	1745.59	1743.08	1135.16	1076.86	1112.15	1729.7	1108.06	0.640605	5.02103e-06
201735_s_at	CLCN3	1373.64	1329.75	1294.96	2114.12	2000.14	2124.2	1332.78	2079.49	1.56026	4.15273e-05
238538_at	ANKRD11	3479.84	3377.81	3327.55	5176.32	5283.25	5430.21	3395.07	5296.59	1.56008	1.24742e-05
226455_at	CREB3L4	374.838	399.107	374.856	593.147	595.494	603.181	382.934	597.274	1.55973	7.82064e-06
214735_at	PIP3-E	328.025	341.192	324.236	519.645	505.084	524.02	331.151	516.25	1.55896	8.84389e-06
227696_at	EXOSC6	1668.44	1615.8	1756.72	2628.79	2605.07	2612.52	1680.32	2615.46	1.55652	1.17136e-05
205510_s_at	FLJ10038	499.855	509.32	476.785	735.738	791.976	784.959	495.32	770.891	1.55635	8.29327e-05
225042_s_at	FAM130A1	274.816	287.048	284.415	426.733	440.472	445.989	282.093	437.731	1.55173	1.09576e-05
203968_s_at	CDC6	1531.95	1497.23	1577.98	1024.49	964.249	987.368	1535.72	992.037	0.645975	2.461e-05
228620_at	---	514.643	515.233	479.964	770.012	782.177	774.808	503.28	775.666	1.54122	1.18526e-05
217826_s_at	UBE2J1	978.371	975.701	887.779	1445.92	1467.59	1465.86	947.284	1459.79	1.54103	3.70601e-05
223809_at	RGS18	215.691	212.334	219.878	325.176	333.378	338.718	215.968	332.424	1.53923	6.63654e-06
218380_at	NLRP1	353.88	355.097	365.135	541.577	538.014	572.61	358.037	550.734	1.5382	3.78194e-05
201691_s_at	TPD52	370.671	362.284	352.156	533.41	573.153	561.851	361.703	556.138	1.53755	5.78274e-05
212932_at	RAB3GAP1	398.818	433.448	395.695	634.748	618.697	633.98	409.32	629.142	1.53704	3.78424e-05
211760_s_at	VAMP4	239.45	246.092	252.774	367.609	384.859	382.283	246.105	378.25	1.53694	1.84426e-05
228702_at	FLJ43663	158.98	154.318	155.356	235.093	239.928	245.258	156.218	240.093	1.53691	6.76226e-06
218912_at	GCC1	756.513	753.778	736.298	1096.51	1195.96	1159.18	748.863	1150.55	1.5364	8.66525e-05
203946_s_at	ARG2	397.111	425.952	416.659	611.113	630.002	661.056	413.241	634.057	1.53435	9.80838e-05
222995_s_at	RHBDD2	657.89	677.37	694.976	1054.77	1031.47	1027.98	676.745	1038.07	1.53392	5.99585e-06
224579_at	SLC38A1	5096.88	5007.5	4706.59	7339.47	7801.31	7575	4936.99	7571.92	1.53371	6.07354e-05
227477_at	ZMYND19	2592.28	2664.97	2582.85	1787.64	1643.11	1682.98	2613.36	1704.58	0.652255	2.75972e-05
209815_at	PTCH1	270.659	285.546	275.367	409.92	434.454	430.175	277.19	424.85	1.5327	3.6132e-05
212282_at	TMEM97	3930.57	4001.5	4068.95	2753.1	2478.81	2601.09	4000.34	2611	0.652694	4.87873e-05
224566_at	TncRNA	809.999	801.654	742.513	1182.68	1192.35	1227.83	784.722	1200.95	1.53042	3.99072e-05
205284_at	KIAA0133	1155.17	1123.3	1169.8	783.216	738.513	734.308	1149.42	752.012	0.654252	2.21743e-05
221472_at	SERINC3	2014.44	1927.61	2066.9	2956.74	3114.87	3101.03	2002.99	3057.55	1.52649	4.18549e-05
229285_at	RNASEL	610.517	631.149	662.374	998.375	961.671	945.697	634.68	968.581	1.52609	5.19361e-05
200027_at	NARS	7159.34	7163.54	7352.78	10576.1	11519.3	10968.8	7225.22	11021.4	1.52541	8.67098e-05
221649_s_at	PPAN	2052.84	2108.39	2141.79	1362.69	1408.15	1361.53	2101.01	1377.46	0.655618	8.93149e-06
221471_at	SERINC3	1728.75	1744.87	1856.79	2691.59	2697.42	2725.52	1776.8	2704.84	1.52231	1.19548e-05
225133_at	KLF3	155.142	166.139	157.117	245.686	241.494	240.923	159.466	242.701	1.52196	1.15957e-05
225656_at	EFHC1	287.303	275.898	284.856	420.922	429.644	440.066	282.686	430.211	1.52187	1.13656e-05
223240_at	FBXO8	560.153	589.701	567.789	866.72	860.908	876.832	572.548	868.153	1.5163	3.90397e-06
210817_s_at	CALCOCO2	1796.21	1756.04	1730.49	2602.22	2706.63	2699.54	1760.91	2669.46	1.51595	9.79372e-06
201393_s_at	IGF2R	2416.58	2257.98	2433.6	3471.02	3571.22	3722.76	2369.39	3588.33	1.51446	9.41424e-05
241379_at	C2orf13	131.967	143.169	133.253	204.816	204.363	208.227	136.13	205.802	1.51181	2.45284e-05
226839_at	NR2C2AP	871.295	876.076	859.012	611.397	536.633	576.492	868.794	574.841	0.661654	9.37946e-05
201989_s_at	CREBL2	569.842	615.594	568.922	860.019	893.371	896.216	584.786	883.202	1.5103	5.10281e-05
203387_s_at	TBC1D4	903.987	947.593	948.164	1401.42	1396.51	1428.01	933.248	1408.65	1.5094	5.58667e-06
225861_at	C16orf14	1257.23	1247.39	1246.46	851.865	788.371	845.533	1250.36	828.589	0.66268	1.64323e-05
203097_s_at	RAPGEF2	1115.01	1145.75	1163.09	1697.03	1709.33	1760.19	1141.28	1722.18	1.50899	8.50853e-06
225582_at	ITPRIP	773.535	787.916	778.093	1183.27	1159.76	1184.61	779.848	1175.88	1.50783	8.38788e-07
204033_at	TRIP13	2637.79	2728.99	2613.82	1847.06	1668.38	1781.44	2660.2	1765.62	0.663719	7.08847e-05
201057_s_at	GOLGB1	723.854	738.285	731.818	1074.86	1134.4	1094.46	731.319	1101.24	1.50583	1.65806e-05
202531_at	IRF1	913.226	929.348	906.91	648.738	586.916	593.275	916.495	609.643	0.66519	6.07342e-05
229429_x_at	FAM91A2	689.667	664.488	674.681	1000.77	1007.77	1040.33	676.279	1016.29	1.50277	9.06029e-06
1558044_s_at	EXOSC6	1057.7	1021	1033.07	1582.12	1531.65	1561.9	1037.26	1558.55	1.50257	4.43251e-06
220917_s_at	WDR19	773.794	806.875	803.629	1160.36	1201.44	1219.55	794.766	1193.79	1.50206	2.02671e-05
211962_s_at	ZFP36L1	733.864	733.807	682.288	1059.94	1077.1	1090.83	716.653	1075.96	1.50136	2.48397e-05
224840_at	FKBP5	2396.07	2390.95	2414.93	1645.94	1549.9	1603.03	2400.65	1599.62	0.66633	4.91345e-06
219961_s_at	C20orf19	533.164	567.76	532.298	795.651	842.704	808.922	544.407	815.759	1.49844	5.94063e-05
213126_at	MED8	448.038	445.888	470.226	688.95	688.004	666.382	454.718	681.112	1.49788	1.48377e-05
218234_at	ING4	424.625	422.172	408.015	643.345	611.273	623.152	418.271	625.923	1.49645	2.07609e-05
244008_at	---	324.46	356.417	344.847	500.447	511.916	521.387	341.908	511.25	1.49529	5.44357e-05
230836_at	ST8SIA4	1295.29	1238.31	1174.74	1805.65	1875.44	1861.26	1236.11	1847.45	1.49456	5.78636e-05
225090_at	SYVN1	1287.04	1308.08	1217.07	1926.41	1858.17	1912.94	1270.73	1899.17	1.49455	2.67936e-05
218854_at	DSE	428.454	441.535	404.642	653.011	620.518	631.077	424.877	634.869	1.49424	6.48208e-05
226609_at	DCBLD1	193.098	195.466	184.988	291.103	280.104	285.286	191.184	285.498	1.49331	1.51729e-05
218237_s_at	SLC38A1	1754.53	1825.67	1649.65	2588.62	2545.71	2671.9	1743.28	2602.08	1.49263	8.45417e-05
230069_at	SFXN1	2283.42	2322.47	2174.71	1569.03	1448.89	1527.73	2260.2	1515.22	0.670391	9.57901e-05
203935_at	ACVR1	451.891	481.199	466.271	678.248	725.617	683.065	466.453	695.643	1.49135	9.30859e-05
223743_s_at	MRPL4	1136.12	1157.69	1167.22	822.249	738.897	765.696	1153.68	775.614	0.672298	6.73707e-05
212048_s_at	YARS	4205.64	4182.73	4194.09	6016.69	6440.41	6252.61	4194.15	6236.57	1.48697	3.82244e-05
219164_s_at	ATG2B	290.19	308.369	288.52	437.186	452.173	429.588	295.693	439.649	1.48684	4.84669e-05
220169_at	TMEM156	175.796	175.491	169.017	247.237	262.521	263.002	173.435	257.586	1.48521	5.83042e-05
214467_at	GPR65	531.455	530.75	521.038	753.954	790.521	805.768	527.748	783.415	1.48445	4.1994e-05
211576_s_at	SLC19A1	1443.48	1422.92	1399.06	985.729	937.037	951.072	1421.82	957.946	0.673747	8.96576e-06
204494_s_at	C15orf39	531.44	516.345	527.56	368.395	341.981	351.562	525.115	353.979	0.674099	2.20281e-05
202386_s_at	KIAA0430	1293.58	1280.24	1321.83	1931.95	1910.44	1928.81	1298.55	1923.74	1.48145	7.47042e-07
212867_at	---	501.181	522.138	508.02	729.795	773.824	760.493	510.446	754.704	1.47852	3.5631e-05
228073_at	NANP	2253.5	2214.52	2232.48	1570.19	1474.2	1488.07	2233.5	1510.82	0.676436	1.13896e-05
216904_at	COL6A1	220.851	232.901	221.415	325.26	343.646	329.173	225.055	332.693	1.47827	4.74216e-05
218431_at	C14orf133	629.291	668.227	676.755	956.086	1003.99	956.311	658.091	972.128	1.47719	6.52469e-05
213742_at	SFRS11	239.263	246.302	246.758	355.825	358.976	366.084	244.107	360.295	1.47597	3.72045e-06
225399_at	TSEN15	1653.16	1713.05	1770.78	2560.33	2432.73	2581.37	1712.33	2524.81	1.47449	7.29557e-05
225626_at	PAG1	1026.14	1008.39	1035.04	1467.71	1533.63	1516.3	1023.19	1505.88	1.47175	1.10793e-05
225625_at	ALKBH2	1464.54	1455.99	1402.12	1012.66	950.771	976.232	1440.88	979.887	0.68006	3.22314e-05
203445_s_at	CTDSP2	2060.67	2042.06	2057.25	2945.01	3048.16	3060.74	2053.33	3017.97	1.46979	6.5021e-06
237105_at	---	429.503	419.264	430.066	623.236	614.359	641.461	426.277	626.352	1.46935	1.06673e-05
226989_at	RGMB	600.611	616.101	564.687	880.139	858.532	878.092	593.8	872.254	1.46894	3.80114e-05
236247_at	NSUN4	645.695	651.112	602.619	934.488	923.491	932.012	633.142	929.997	1.46886	2.30335e-05
58696_at	EXOSC4	1576.49	1597.21	1583.72	1121.78	1069.11	1049.4	1585.81	1080.1	0.6811	1.14844e-05
218902_at	NOTCH1	2605.37	2797.86	2712.36	1812.27	1849.12	1868.27	2705.2	1843.22	0.681363	5.99084e-05
1552497_a_at	SLAMF6	296.77	315.545	317.655	446.216	461.191	455.4	309.99	454.269	1.46543	2.6994e-05
1557733_a_at	---	140.468	133.816	137.44	204.58	196.887	201.727	137.241	201.065	1.46504	1.36122e-05
219698_s_at	METTL4	473.722	499.344	488.662	728.112	708.544	704.738	487.242	713.798	1.46497	1.30116e-05
244834_at	C1orf134	316.167	333.322	342.812	475.964	496.834	480.455	330.767	484.418	1.46453	5.33977e-05
226374_at	---	365.297	387.32	380.811	549.582	538.156	571.665	377.81	553.135	1.46406	5.98727e-05
1568597_at	LOC646762	375.058	390.372	379.775	567.057	533.537	573.893	381.735	558.163	1.46217	9.24047e-05
1552370_at	C4orf33	383.875	377.184	391.111	545.027	571.657	567.097	384.057	561.26	1.4614	2.09846e-05
223242_s_at	MFSD11	758.74	774.541	808.304	1123.53	1168.86	1128.74	780.528	1140.37	1.46103	3.07132e-05
218725_at	SLC25A22	675.65	651.055	652.634	464.91	429.152	461.235	659.78	451.766	0.684722	5.7448e-05
64064_at	GIMAP5	1117.63	1093.98	1175.66	756.205	773.929	790.202	1129.09	773.445	0.685017	8.49528e-05
201548_s_at	JARID1B	527.167	525.916	527.06	747.627	776.776	780.437	526.714	768.28	1.45863	1.01349e-05
212259_s_at	PBXIP1	230.579	243.272	226.86	350.861	330.481	340.676	233.571	340.673	1.45854	7.74717e-05
235900_at	SPNS3	360.815	363.561	336.976	506.57	519.243	521.788	353.784	515.867	1.45814	3.70388e-05
205677_s_at	DLEU1	2471.21	2427.8	2443.02	1747.73	1614.52	1674.85	2447.35	1679.03	0.686063	2.28694e-05
205158_at	RNASE4	156.615	164.046	155.552	239.803	224.63	227.761	158.738	230.731	1.45354	8.76438e-05
239208_s_at	C21orf57	391.385	416.33	396.344	589.345	565.525	595.233	401.353	583.368	1.4535	5.25405e-05
213086_s_at	CSNK1A1	4285.04	4200.13	4134.85	5889.45	6270.57	6182.46	4206.67	6114.16	1.45344	5.06743e-05
200749_at	RAN	5326.97	5310.14	5132.04	3815.06	3446.99	3589.44	5256.38	3617.16	0.688147	9.45318e-05
218708_at	NXT1	3521.55	3653.36	3661.95	2530.05	2467.09	2460.6	3612.29	2485.91	0.688182	1.20042e-05
235971_at	---	304.838	295.765	299.371	423.504	444.738	439.251	299.991	435.831	1.45281	1.95058e-05
1556178_x_at	TAF8	608.7	591.971	616.208	884.284	869.164	885.391	605.627	879.613	1.4524	3.27557e-06
201559_s_at	CLIC4	207.019	212.804	208.61	297.337	312.364	302.731	209.478	304.144	1.45192	1.82586e-05
209216_at	WDR45	482.523	523.907	523.457	743.802	732.959	744.191	509.962	740.317	1.45171	4.23059e-05
239307_at	---	251.194	278.932	263.741	391.655	382.328	378.237	264.622	384.074	1.4514	9.1048e-05
218585_s_at	DTL	4213.38	4126.16	4153.8	3018.14	2824.25	2765.92	4164.45	2869.44	0.689031	4.35767e-05
1553992_s_at	NBR2	285.191	280.991	270.382	401.737	397.353	414.213	278.855	404.434	1.45034	2.38895e-05
225285_at	BCAT1	4399.79	4448.13	4217.84	6084.76	6382.66	6469.96	4355.26	6312.46	1.44939	6.78636e-05
243363_at	LOC641518	496.328	496.399	518.189	755.482	709.333	724.849	503.638	729.888	1.44923	6.2244e-05
1553715_s_at	C16orf14	1388.76	1466.05	1423.72	1024.78	960.087	967.566	1426.18	984.143	0.690056	6.40187e-05
206052_s_at	SLBP	6875.06	6889.44	6744.58	4804.14	4765.9	4618.24	6836.36	4729.43	0.691805	4.29959e-06
222465_at	C15orf15	5605.03	5531.28	5430.16	7689.52	8138.09	8105.46	5522.16	7977.69	1.44467	4.41027e-05
204369_at	PIK3CA	478.334	494.616	457.735	681.782	703.738	679.736	476.895	688.419	1.44354	4.36637e-05
214659_x_at	YLPM1	1415.22	1428.11	1375.95	993.708	953.783	977.052	1406.43	974.848	0.693137	1.23241e-05
220606_s_at	C17orf48	521.703	528.759	514.381	745.356	779.794	731.565	521.615	752.239	1.44214	5.12527e-05
220254_at	LRP12	367.753	386.596	362.184	544.886	534.888	530.008	372.178	536.594	1.44177	2.19176e-05
219031_s_at	NIP7	2262.94	2347.8	2217.26	1571.76	1596.96	1568.22	2276	1578.98	0.693752	2.96855e-05
225481_at	FRMD6	298.289	320.425	303.558	440.312	441.062	446.822	307.424	442.732	1.44014	2.09368e-05
201549_x_at	JARID1B	565.483	611.962	554.148	823.231	843.216	826.348	577.198	830.931	1.4396	8.62018e-05
224580_at	SLC38A1	373.739	388.519	362.294	545.797	520.264	551.925	374.85	539.329	1.43878	9.08086e-05
47069_at	PRR5	725.736	702.618	715.68	504.931	489.992	496.068	714.678	496.997	0.695413	5.35643e-06
1557116_at	APOL6	358.906	354.999	358.514	531.842	491.904	518.238	357.473	513.994	1.43786	9.2979e-05
238510_at	ZNF720	831.161	863.78	807.964	1188.78	1211.34	1198.67	834.302	1199.6	1.43785	1.5411e-05
218615_s_at	TMEM39A	812.4	816.248	813.67	1126.18	1205.41	1176	814.106	1169.2	1.43617	5.27045e-05
219324_at	NOL12 /// TRIOBP	864.301	858.519	891.295	624.264	618.63	577.768	871.372	606.887	0.696473	5.96615e-05
206653_at	POLR3G	1417.73	1404.21	1419.31	1004.98	966.203	984.321	1413.75	985.167	0.696847	1.94885e-06
242993_at	---	185.278	187.288	180.6	254.361	268.78	269.96	184.389	264.367	1.43375	6.01314e-05
218432_at	FBXO3	536.502	563.318	567.985	786.363	816.592	787.127	555.935	796.694	1.43307	3.32914e-05
223544_at	TMEM79	356.485	342.729	367.971	507.134	500.643	520.476	355.728	509.418	1.43204	4.00087e-05
218121_at	HMOX2	993.002	946.694	986.853	706.844	679.327	657.871	975.516	681.348	0.698448	6.58079e-05
211596_s_at	LRIG1	501.726	526.49	527.262	738.486	721.88	763.051	518.493	741.139	1.42941	5.4006e-05
224759_s_at	C12orf23	1659.34	1678.58	1682.31	2309.12	2386.12	2475.99	1673.41	2390.41	1.42847	6.2135e-05
218107_at	WDR26	2029.97	1976.78	2145.41	2901.1	2990.81	2892.8	2050.72	2928.24	1.42791	5.88586e-05
230860_at	C3orf34	582.574	574.009	594.143	857.236	823.992	817.599	583.575	832.942	1.42731	2.60296e-05
223309_x_at	PNPLA8	520.52	543.395	559.506	764.968	758.658	791.532	541.14	771.72	1.4261	5.42739e-05
201142_at	EIF2S1	3325.65	3334.9	3259.76	2398.26	2261.15	2297.31	3306.77	2318.9	0.701258	1.56056e-05
224953_at	YIPF5	757.628	768.056	720.219	1039.93	1062.51	1099.81	748.634	1067.42	1.42582	7.4735e-05
227624_at	TET2	592.766	615.41	611.812	845.937	863.907	884.912	606.663	864.919	1.4257	2.05748e-05
206562_s_at	CSNK1A1	1541.56	1547	1488.77	2130.95	2227.02	2156.48	1525.78	2171.48	1.4232	2.3199e-05
201688_s_at	TPD52	1914.66	1790.8	1795.96	2611.98	2550.01	2665.06	1833.81	2609.02	1.42273	6.05871e-05
1559102_at	---	126.132	130.963	133.478	179.689	184.321	191.588	130.191	185.199	1.42252	8.74676e-05
227517_s_at	GAS5	3934.88	3977.2	3954.4	2750.88	2884.36	2710.38	3955.49	2781.87	0.703294	1.32222e-05
226736_at	CHURC1	532.112	546.801	574.903	793.07	760.071	798.198	551.272	783.78	1.42177	8.92424e-05
217823_s_at	UBE2J1	1839.56	1809.42	1816.47	2562.79	2636.49	2570.32	1821.82	2589.87	1.42159	3.40877e-06
200620_at	TMEM59	1954.11	2004.99	2159.05	2929.17	2913.8	2853.74	2039.38	2898.9	1.42146	9.89336e-05
204526_s_at	TBC1D8	765.07	774.451	742.075	1053.51	1104.94	1081.47	760.532	1079.98	1.42003	2.77378e-05
232194_at	METTL4	541.823	522.23	540.509	762.794	748.265	766.4	534.854	759.153	1.41937	5.87051e-06
221430_s_at	RNF146	260.2	277.137	268.16	381.77	387.533	372.525	268.499	380.609	1.41754	3.43885e-05
203460_s_at	PSEN1	789.219	794.396	774.653	1096.44	1123.11	1115.85	786.089	1111.8	1.41434	2.56099e-06
225585_at	RAP2A	1469.07	1394.79	1422	1996.15	1996.31	2067.43	1428.62	2019.96	1.41392	2.57179e-05
211202_s_at	JARID1B	618.905	604.532	612.762	876.075	855.012	864.669	612.066	865.252	1.41366	2.14763e-06
1553713_a_at	RHEBL1	275.749	290.672	279.804	403.325	396.03	396.667	282.075	398.674	1.41336	1.02525e-05
201964_at	SETX	1108.74	1095.24	1098.55	1523.76	1597.03	1541.63	1100.84	1554.14	1.41177	1.76901e-05
209864_at	FRAT2	577.252	606.379	562.647	821.668	810.385	831.883	582.093	821.312	1.41096	3.71554e-05
206542_s_at	SMARCA2	892.199	842.328	907.225	1273.35	1210.75	1243.19	880.584	1242.43	1.41091	8.54493e-05
209777_s_at	SLC19A1	744.995	725.161	756.515	529.493	514.315	536.181	742.224	526.663	0.709575	2.15587e-05
213016_at	---	315.421	339.276	312.944	451.31	452.323	459.037	322.547	454.223	1.40824	5.65072e-05
229295_at	LOC150166	1072.16	1090.97	1154.41	1520.96	1563.23	1587.25	1105.84	1557.15	1.40811	6.92556e-05
205004_at	NKRF	1126.06	1083.04	1058.54	783.703	779.019	758.942	1089.21	773.888	0.710503	5.88948e-05
229009_at	SIX5	344.557	337.495	357.359	478.1	496.994	487.59	346.47	487.561	1.40722	2.99314e-05
224570_s_at	IRF2BP2	2728.17	2748.22	2660.64	3683.93	3912.99	3825.09	2712.34	3807.34	1.40371	5.38592e-05
214437_s_at	SHMT2	1534.62	1546.42	1598.64	2144.05	2247.02	2173.86	1559.89	2188.31	1.40286	3.29205e-05
1555638_a_at	SAMSN1	509.105	515.746	495.712	718.024	726.945	687.502	506.854	710.824	1.40242	5.29846e-05
223172_s_at	MTP18	1186.23	1186.19	1236.54	885.787	824.806	863.725	1202.99	858.106	0.713314	7.36702e-05
209308_s_at	BNIP2	1879.22	1816.44	1757.82	2531.9	2567.59	2541.42	1817.83	2546.97	1.40111	1.88096e-05
219819_s_at	MRPS28	2949.63	2911.4	2971.62	2173.91	2000.52	2130.05	2944.22	2101.49	0.713769	5.26954e-05
232594_at	LOC440498	394.467	406.099	384.271	535.016	558.483	565.731	394.946	553.077	1.40039	7.33175e-05
214390_s_at	BCAT1	306.961	319.075	298.943	433.115	420.628	439.245	308.326	430.996	1.39786	5.31629e-05
215440_s_at	BEX4	686.072	688.389	705.751	989.288	957.58	959.397	693.404	968.755	1.3971	1.07203e-05
226026_at	DIRC2	369.184	379.068	379.447	511.196	542.494	520.092	375.9	524.594	1.39557	5.72183e-05
211709_s_at	CLEC11A	2068.06	2083.22	1993.31	1508.61	1404.09	1492.95	2048.2	1468.55	0.716996	8.59964e-05
212168_at	CPNE1 /// RBM12	3382.43	3395.2	3373.11	2566.4	2333.26	2378.42	3383.58	2426.03	0.717	9.07501e-05
219376_at	ZNF322B	279.851	295.322	289.13	404.644	396.977	402.704	288.101	401.442	1.39341	1.16739e-05
223670_s_at	HEMGN	182.545	173.595	178.406	246.728	253.454	244.614	178.182	248.265	1.39333	2.32172e-05
221564_at	PRMT2	583.532	591.401	600.587	802.692	823.696	847.285	591.84	824.558	1.39321	3.61454e-05
225887_at	C13orf23	2913.14	2753.46	2654.36	3794.67	3883.13	3914.07	2773.65	3863.96	1.3931	9.90041e-05
220651_s_at	MCM10	1778.71	1793.08	1718.57	1317.58	1225.35	1258.58	1763.45	1267.17	0.718572	7.45048e-05
225193_at	---	461.171	459.441	463.975	628.874	646.207	651.205	461.529	642.095	1.39123	6.31341e-06
1559045_at	LOC100128288	200.842	201.317	197.675	267.801	287.319	279.289	199.944	278.136	1.39107	8.62869e-05
212623_at	TMEM41B	869.247	898.097	896.567	1193.37	1250.22	1257.77	887.971	1233.79	1.38945	5.12054e-05
235061_at	PPM1K	647.521	650.524	661.995	889.424	903.83	929.782	653.346	907.679	1.38928	1.78075e-05
225226_at	FAM40A	811.966	837.286	821.843	1111.44	1171.24	1149.87	823.698	1144.19	1.38908	3.6083e-05
63009_at	SHQ1	4992.5	4996.16	5050.79	3745.14	3515.92	3566.8	5013.15	3609.29	0.719964	2.0408e-05
226351_at	NSUN4	465.075	470.747	493.749	648.293	666.959	668.656	476.524	661.303	1.38776	3.58542e-05
204076_at	ENTPD4	1220.1	1265.15	1162.64	1708.69	1673.85	1679.53	1215.96	1687.36	1.38767	5.85605e-05
218719_s_at	GINS3	2084.15	2151.66	2229.88	1581.51	1549.07	1533.47	2155.23	1554.68	0.721354	8.66075e-05
1560156_at	---	155.371	158.502	161.275	213.951	217.418	227.038	158.383	219.469	1.38569	6.93392e-05
212207_at	MED13L	881.944	885.149	867.439	1173.65	1216.61	1260.04	878.177	1216.76	1.38556	9.33556e-05
214095_at	SHMT2	833.157	811.235	850.306	1141.6	1149.39	1161.79	831.566	1150.93	1.38405	7.52646e-06
213295_at	CYLD	493.533	507.358	503.35	681.572	700.502	699.53	501.413	693.868	1.38382	6.48883e-06
218112_at	MRPS34	2328.09	2410.02	2331.27	1784.24	1651.94	1672.77	2356.46	1702.98	0.722688	9.16547e-05
213860_x_at	CSNK1A1	5477.45	5497.26	5444.25	7335.47	7790.62	7560.97	5472.99	7562.35	1.38176	4.69639e-05
202149_at	NEDD9	346.461	357.497	373.933	498.421	498.683	492.258	359.297	496.454	1.38174	3.83926e-05
210038_at	PRKCQ	1426.87	1460.62	1476.76	1958.48	2047.04	2021.53	1454.75	2009.02	1.38101	2.57418e-05
212697_at	FAM134C	1214.9	1215.66	1191.96	1667.58	1659.41	1675.37	1207.51	1667.46	1.3809	4.46259e-07
223414_s_at	LYAR	3150.58	3190.68	3266.39	2332.61	2377.57	2258.78	3202.55	2322.98	0.725355	2.7174e-05
223570_at	MCM10	2011.31	1966.81	1926.6	1475.68	1387.73	1420.83	1968.24	1428.08	0.725562	5.40548e-05
217915_s_at	C15orf15	6680.01	6666.88	6474.24	8897.98	9367.35	9046.43	6607.04	9103.92	1.37791	4.19548e-05
232140_at	LOC100132352	733.504	795.758	770.697	1054.12	1041.86	1073.11	766.653	1056.36	1.37789	6.92016e-05
208785_s_at	MAP1LC3B	842.808	822.129	855.792	1136.87	1150.26	1178.9	840.243	1155.34	1.37501	1.86717e-05
217370_x_at	FUS	2342.79	2387.94	2393.58	1808.47	1692.66	1680.51	2374.77	1727.22	0.727319	6.10971e-05
223403_s_at	POLR1B	2025.01	2044.21	1996.03	1497.75	1455.26	1459.1	2021.75	1470.7	0.72744	4.66265e-06
226657_at	MGC33894	199.25	212.291	202.945	280.478	278.189	285.5	204.829	281.389	1.37378	3.3215e-05
208786_s_at	MAP1LC3B	1579.37	1692.79	1686.06	2247.42	2236.37	2325.61	1652.74	2269.8	1.37336	9.11733e-05
216064_s_at	AGA	218.474	215.886	214.45	303.033	297.984	289.559	216.27	296.859	1.37263	1.98086e-05
235113_at	PPIL5	3692.98	3578.63	3549.14	2726.73	2608.26	2551.1	3606.92	2628.7	0.728794	6.71403e-05
229269_x_at	LOC646044 /// SSBP4	2808.72	2878.41	2773.72	2125.2	2045.86	1996.12	2820.28	2055.73	0.728908	4.75946e-05
212911_at	DNAJC16	606.045	591.161	599.354	818.649	845.158	800.475	598.854	821.427	1.37167	4.1622e-05
238458_at	EFHA2	264.465	282.157	258.559	363.476	371.78	368.411	268.394	367.889	1.3707	9.27496e-05
203389_at	KIF3C	354.959	360.888	350.644	486.773	483.757	491.226	355.497	487.252	1.37062	1.81135e-06
223471_at	RAB3IP	479.111	496.792	502.69	676.506	667.179	682.72	492.864	675.468	1.37049	1.32571e-05
225732_at	KLHDC5	1602.31	1592.02	1592.13	1210.91	1172.72	1110.81	1595.49	1164.81	0.730067	6.28518e-05
225682_s_at	POLR3H	2353.9	2335.44	2397.71	1746.53	1662.19	1766.56	2362.35	1725.1	0.730246	3.3083e-05
206700_s_at	JARID1D	1345.56	1388.73	1449.94	1918.07	1882.13	1929.21	1394.74	1909.8	1.36929	5.18951e-05
200847_s_at	TMEM66	3795.52	3962.51	3969.57	5285.56	5292.5	5449.28	3909.2	5342.45	1.36663	2.58726e-05
39582_at	CYLD	392.732	403.139	394.482	541.147	543.15	542.294	396.784	542.197	1.36648	7.63848e-07
219826_at	ZNF419	488.186	482.218	493.002	649.245	673.985	675.605	487.802	666.278	1.36588	1.97716e-05
226521_s_at	FAM175A	569.372	575.818	595.026	776.779	793.846	803.169	580.072	791.265	1.36408	2.10035e-05
219177_at	BXDC2	2389.37	2357.58	2406.96	1730.11	1774.99	1750.16	2384.64	1751.75	0.734598	2.64459e-06
228846_at	MXD1	157.615	162.905	157.699	224.26	214.715	211.546	159.407	216.84	1.3603	8.29962e-05
229422_at	NRD1	358.391	377.042	354.881	489.069	494.739	498.998	363.438	494.269	1.35998	3.09414e-05
1554453_at	HNRPLL	249.51	243.208	248.256	346.54	332.859	328.303	246.991	335.901	1.35997	5.31245e-05
1554148_a_at	SLC33A1	446.922	427.844	443.807	600.77	599.581	592.48	439.524	597.61	1.35967	8.22631e-06
209320_at	ADCY3	768.222	784.685	755.005	582.702	544.069	571.339	769.304	566.037	0.735778	7.15452e-05
224558_s_at	MALAT1	458.931	498.882	474.652	659.407	643.722	643.541	477.488	648.89	1.35896	8.8684e-05
203467_at	PMM1	810.306	806.026	848.023	1119.53	1113.68	1114.46	821.452	1115.89	1.35844	1.29538e-05
225933_at	CCDC137	936.124	940.327	942.524	707.575	703.963	664.854	939.658	692.131	0.736577	2.84429e-05
219559_at	C20orf59	374.539	355.124	364.211	273.58	263.378	269.063	364.625	268.674	0.73685	5.54781e-05
230383_x_at	---	452.806	438.636	440.995	598.167	600.959	608.574	444.146	602.567	1.35669	3.94392e-06
1557119_a_at	ZNF575	539.145	576.147	557.066	748.653	762.764	756.903	557.453	756.107	1.35636	3.22801e-05
200779_at	ATF4	9098.57	9265.33	8788.09	12606.2	11941.7	12276.2	9050.66	12274.7	1.35622	8.50697e-05
227544_at	C14orf83	462.724	469.511	466.7	356.061	335.096	342.448	466.312	344.535	0.738852	2.31668e-05
212355_at	KIAA0323	481.067	487.486	488.481	655.161	659.604	656.901	485.678	657.222	1.3532	1.72861e-07
229509_at	MFSD8	318.253	324.936	326.101	435.912	443.22	432.147	323.096	437.093	1.35282	4.8224e-06
212130_x_at	EIF1	8687.71	8813.72	8759.82	11521.1	12083.3	11906.5	8753.75	11836.9	1.35221	2.71411e-05
235076_at	CALCOCO2	362.567	378.419	356.549	501.442	479.604	499.714	365.845	493.587	1.34917	9.1232e-05
210039_s_at	PRKCQ	776.724	826.698	803.306	1091.68	1087.38	1066.84	802.243	1081.97	1.34868	3.41877e-05
236655_at	TPD52	467.541	467.841	455.254	643.234	606.156	626.012	463.545	625.134	1.34859	7.41021e-05
209061_at	NCOA3	590.346	600.873	604.833	809.509	790.281	819.236	598.684	806.342	1.34686	1.31925e-05
206102_at	GINS1	4769.39	4613.51	4694.53	3581.46	3436.76	3443.27	4692.48	3487.16	0.743139	2.52068e-05
226310_at	RICTOR	344.071	339.346	331.497	440.381	459.521	465.788	338.304	455.23	1.34562	8.00231e-05
55872_at	ZNF512B	2467.99	2478.26	2414.57	1851.34	1807.86	1811.32	2453.61	1823.51	0.743193	6.43793e-06
91684_g_at	EXOSC4	1444.28	1505.33	1499.69	1081.83	1100.09	1125.2	1483.1	1102.38	0.743291	4.02381e-05
206855_s_at	HYAL2	713.996	724.238	737.714	549.585	521.634	546.399	725.316	539.206	0.743408	3.82756e-05
207515_s_at	POLR1C	1518.26	1561.55	1532.78	1191.18	1115.24	1123.72	1537.53	1143.38	0.743647	6.57967e-05
207643_s_at	TNFRSF1A	911.152	914.875	894.224	1202.59	1249.45	1205.5	906.751	1219.18	1.34456	2.25705e-05
204175_at	ZNF593	1793.68	1846.9	1871.75	1373.78	1373.18	1356.88	1837.44	1367.95	0.744484	1.91013e-05
228671_at	TMEM201	402.211	418.186	418.618	313.707	302.489	306.264	413.005	307.486	0.74451	3.78142e-05
213165_at	CEP350	2248.43	2343.8	2166.01	2990.69	3056.55	3026.09	2252.75	3024.44	1.34256	7.3684e-05
201836_s_at	SUPT7L	342.961	354.404	368.478	474.637	468.324	487.496	355.281	476.819	1.34209	9.84656e-05
231730_at	SEPSECS	249.329	256.31	247.115	333.275	339.59	337.084	250.918	336.65	1.34167	6.70877e-06
222127_s_at	EXOC1	990.246	1008.74	1053.82	1352.72	1389.54	1353.4	1017.6	1365.22	1.34161	5.08226e-05
202061_s_at	SEL1L	1309.85	1360.91	1324.42	1750.27	1781.22	1825.16	1331.73	1785.55	1.34078	3.41358e-05
236428_at	---	228.856	237.826	241.626	311.439	312.633	325.566	236.103	316.546	1.34071	8.36971e-05
242008_at	---	206.88	203.368	202.65	265.755	282.274	273.681	204.299	273.903	1.3407	7.39783e-05
205748_s_at	RNF126	665.178	681.823	685.651	518.613	499.65	497.977	677.551	505.414	0.745942	2.32598e-05
218993_at	RNMTL1	1316.18	1331.55	1329.88	1009.46	954.307	1004.19	1325.87	989.321	0.746166	2.53556e-05
207786_at	CYP2R1	262.903	281.19	260.661	361.756	357.415	359.253	268.251	359.475	1.34007	8.04599e-05
228153_at	RNF144B	316.841	317.713	308.916	411.651	432.511	419.788	314.49	421.317	1.33968	4.48047e-05
209359_x_at	RUNX1	433.406	438.115	436.251	580.665	593.061	577.341	435.924	583.689	1.33897	3.82731e-06
238946_at	---	174.794	176.327	169.879	231.914	236.442	229.138	173.667	232.498	1.33876	1.70362e-05
218146_at	GLT8D1	1659.96	1663.91	1688.33	2204.8	2266.23	2237.78	1670.73	2236.27	1.3385	4.51109e-06
214436_at	FBXL2	210.181	219.991	220.016	286.12	292.873	291.089	216.729	290.027	1.3382	2.23601e-05
227638_at	KIAA1632	318.453	320.488	316.087	431.926	409.808	436.021	318.343	425.918	1.33792	9.93706e-05
227247_at	PLEKHA8	1298.09	1299.17	1305.44	1778.43	1675.24	1767.01	1300.9	1740.23	1.33771	8.92124e-05
212276_at	LPIN1	1076.58	1064.76	1038.9	1413.32	1423.72	1410.11	1060.08	1415.72	1.33548	3.68478e-06
202021_x_at	EIF1	9141.54	9188.62	9314.19	11971.9	12544.3	12385.6	9214.78	12300.6	1.33488	3.26526e-05
217852_s_at	ARL8B	2861.08	2944.69	2996.46	3925.19	3984.99	3839.61	2934.08	3916.59	1.33486	3.50002e-05
209210_s_at	FERMT2	803.397	854.125	861.918	1109.79	1109.19	1142.97	839.813	1120.65	1.3344	9.86987e-05
227904_at	AZI2	775.957	801.011	790.901	1036.15	1078.59	1043.35	789.29	1052.7	1.33373	3.08327e-05
209217_s_at	WDR45	338.478	345.523	339.051	457.092	456.421	450.214	341.018	454.576	1.333	1.75807e-06
201877_s_at	PPP2R5C	2014.49	1970.56	1935.45	2672.07	2584.33	2634.25	1973.5	2630.22	1.33277	2.16258e-05
207238_s_at	PTPRC	2303.63	2274.06	2325.33	3043.13	3154.55	2996.79	2301.01	3064.82	1.33195	4.9917e-05
226301_at	C6orf192	986.536	994.89	1007.47	1336.76	1299.51	1337.74	996.298	1324.67	1.32959	9.73178e-06
211009_s_at	ZNF271	638.591	680.21	682.559	892.264	869.215	897.444	667.12	886.308	1.32856	9.7514e-05
1554479_a_at	CARD8	565.295	572.27	567.171	764.921	743.02	756.175	568.245	754.705	1.32813	4.94979e-06
209709_s_at	HMMR	1013.72	1024.47	1016.83	1321.9	1388.51	1345.96	1018.34	1352.12	1.32777	3.58268e-05
215483_at	AKAP9	139.564	141.468	146.317	186.021	190.563	190.758	142.45	189.114	1.32758	2.56979e-05
231283_at	MGAT4A	392.697	406.139	391.664	520.137	538.995	520.404	396.833	526.512	1.32678	3.81612e-05
238508_at	DBF4B	640.945	678.742	671.182	881.266	878.062	882.101	663.623	880.476	1.32677	2.4205e-05
223222_at	SLC25A19	1282.76	1265.75	1314.14	997.925	950.051	963.928	1287.55	970.634	0.753861	4.70527e-05
221777_at	C12orf52	1049.67	1058.22	1068.99	822.627	780.088	792.962	1058.96	798.559	0.754097	2.30875e-05
205690_s_at	BUD31	3075.31	3152.98	3253.48	4165.16	4217.57	4190.01	3160.59	4190.91	1.32599	2.18234e-05
218758_s_at	RRP1	1027.4	1062.62	1014.8	788.155	787.271	767.428	1034.94	780.951	0.754587	4.4104e-05
202164_s_at	CNOT8	2426.91	2461.34	2299.93	3203.22	3142.66	3178.11	2396.06	3174.66	1.32495	5.8527e-05
212227_x_at	EIF1	9229.09	9471.01	9430.43	12072.6	12802.3	12366.9	9376.84	12414	1.32389	8.67945e-05
219083_at	SHQ1	6671.72	6694.45	6611.78	5130.49	5011.11	4968.3	6659.32	5036.64	0.756329	3.7706e-06
218001_at	MRPS2	1200.94	1175.99	1198.08	913.52	927.314	863.9	1191.67	901.578	0.756567	7.67531e-05
230098_at	PHF20L1	997.419	1010.33	995.271	1299.32	1320.69	1347.16	1001.01	1322.39	1.32106	1.26452e-05
225019_at	CAMK2D	359.335	365.467	358.002	464.134	489.331	476.64	360.935	476.702	1.32074	5.49605e-05
208867_s_at	CSNK1A1	1249.31	1260.09	1222.37	1622.72	1611.93	1693.22	1243.92	1642.62	1.32052	6.91731e-05
222553_x_at	OXR1	1049.43	1002.79	1019.06	1384.82	1332.05	1335.21	1023.76	1350.7	1.31935	5.84482e-05
211763_s_at	UBE2B	1359.98	1356.13	1346.55	1764.01	1787.51	1808.09	1354.22	1786.54	1.31924	2.70539e-06
203462_x_at	EIF3B	4013.85	4004.98	4018.01	3155.7	2997.94	2981.27	4012.28	3044.97	0.758913	3.22776e-05
209434_s_at	PPAT	1784.58	1753.53	1719.45	1290.03	1323.9	1376.7	1752.52	1330.21	0.759027	8.90669e-05
221502_at	KPNA3	3561.57	3565.72	3552.17	2799.43	2647.75	2661.27	3559.82	2702.82	0.759257	3.04415e-05
1553928_at	ELMOD2	281.143	284.12	284.894	369.145	378.485	371.848	283.386	373.159	1.31679	3.71926e-06
223441_at	SLC17A5	394.005	399.299	381.58	515.685	523.834	506.078	391.628	515.199	1.31553	3.65277e-05
202212_at	PES1	2302.27	2382.07	2418.04	1826.13	1804.52	1770.85	2367.46	1800.5	0.760521	5.7573e-05
214096_s_at	SHMT2	3405.71	3404.05	3499.76	4397.41	4513.35	4626.86	3436.51	4512.54	1.31312	6.29927e-05
227471_at	HACE1	1051.52	1043.75	1070.81	1355.56	1401.55	1395.58	1055.36	1384.23	1.31162	1.88207e-05
208828_at	POLE3	4826.81	4796.88	4934.03	3804.7	3626.73	3671.87	4852.57	3701.1	0.76271	3.50871e-05
238497_at	TMEM136	196.33	206.604	208.13	262.149	272.766	265.945	203.688	266.953	1.3106	9.84671e-05
224756_s_at	BAT5	1159.83	1179.08	1143.59	1519.86	1534.8	1507.17	1160.84	1520.61	1.30993	5.06776e-06
33494_at	ETFDH	530.707	555.464	564.125	721.761	726.483	713.177	550.099	720.473	1.30972	4.62076e-05
206958_s_at	UPF3A	966.527	970.089	964.603	1234.46	1301.8	1261.58	967.073	1265.95	1.30905	5.42376e-05
209317_at	POLR1C	2284.26	2367.24	2329.63	1750.56	1783	1799.75	2327.04	1777.77	0.763962	1.99097e-05
235258_at	DCP2	607.87	597.683	611.6	789.036	778.259	807.206	605.718	791.501	1.30671	1.94538e-05
202105_at	IGBP1	1732.82	1707.16	1788.58	2248.51	2308.28	2270.22	1742.85	2275.67	1.30572	2.84143e-05
223263_s_at	FGFR1OP2	1000.99	1020.77	989.109	1340.23	1317.36	1270.83	1003.62	1309.47	1.30475	8.34609e-05
200875_s_at	NOL5A	9364.06	9298.12	9536.95	7333.87	7065.5	7227.5	9399.71	7208.96	0.766934	1.59691e-05
1552310_at	C15orf40	1057.57	1084.78	1139.15	1417.83	1427.86	1432.28	1093.83	1425.99	1.30366	8.37333e-05
225272_at	SAT2	638.282	655.765	632.546	827.049	841.211	840.64	642.198	836.3	1.30225	1.02832e-05
209085_x_at	RFC1	1416.93	1410.44	1422.17	1793.78	1900.99	1837.95	1416.51	1844.24	1.30196	8.29723e-05
209984_at	JMJD2C	898.964	916.655	933.336	1164.53	1218.68	1195.25	916.318	1192.82	1.30175	5.90714e-05
210766_s_at	CSE1L	3879.83	3855.85	3981.92	3038.77	2988.56	2976.09	3905.87	3001.14	0.768366	1.52747e-05
207199_at	TERT	333.279	344.078	331.481	265.673	258.498	251.101	336.279	258.424	0.768481	8.66556e-05
225194_at	PLRG1	2696.28	2618.34	2718.24	3416.14	3530.11	3499.68	2677.62	3481.98	1.3004	3.03373e-05
241388_at	---	222.066	230.496	233.315	295.866	295.208	300.748	228.626	297.274	1.30026	2.77264e-05
214992_s_at	DNASE2	428.892	411.625	415.46	529.601	547.684	555.161	418.659	544.149	1.29974	8.42923e-05
218530_at	FHOD1	741.044	740.807	694.267	939.867	936.664	951.235	725.373	942.589	1.29945	8.88039e-05
230156_x_at	CHD2	118.269	122.729	115.94	157.457	154.568	151.617	118.98	154.547	1.29894	8.39032e-05
213604_at	---	1030.04	1007.11	1025.6	808.504	769.891	781.322	1020.92	786.573	0.770457	3.16803e-05
226127_at	ALKBH3	1461.32	1474.09	1482.91	1860.21	1959.39	1913.6	1472.77	1911.06	1.2976	5.84689e-05
238694_at	---	681.332	690.428	676.187	538.937	514.747	524.858	682.649	526.181	0.770793	2.17613e-05
225284_at	LOC144871	1752.09	1695.07	1761.7	2234.36	2239.41	2282.86	1736.29	2252.21	1.29714	1.86596e-05
205298_s_at	BTN2A2	554.323	533.742	526.441	707.518	703.471	683.212	538.169	698.067	1.29712	7.07623e-05
211701_s_at	TRO	418.824	431.356	425.191	552.954	546.874	554.127	425.124	551.318	1.29684	3.86348e-06
225038_s_at	SURF6	1627.91	1640.43	1622.64	1309.17	1227.9	1235.53	1630.33	1257.54	0.771339	7.34831e-05
204197_s_at	RUNX3	950.324	963.85	983.696	749.821	759.198	726.512	965.956	745.177	0.77144	4.36562e-05
222983_s_at	PAIP2	3835.61	3872.34	3935.23	5148.71	4941.06	5001.57	3881.06	5030.45	1.29615	3.62742e-05
227256_at	USP31	647.463	649.474	664.529	493.591	503.739	516.775	653.822	504.702	0.771925	3.25155e-05
215501_s_at	DUSP10	203.093	200.813	202.669	257.235	262.342	266.017	202.192	261.865	1.29513	1.13588e-05
1567282_at	OR1J4	313.544	314.856	325.729	239.969	251.317	245.851	318.043	245.712	0.772575	6.98017e-05
201736_s_at	2011-03-06	1343.76	1366.94	1310.93	1765.64	1701.99	1734.66	1340.55	1734.09	1.29357	4.41347e-05
212858_at	PAQR4	960.704	950.723	958.08	767.716	713.731	737.754	956.502	739.734	0.773373	8.37862e-05
226756_at	---	446.094	448.51	464.607	577.504	589.531	589.667	453.07	585.567	1.29244	2.38936e-05
205130_at	RAGE	330.214	354.403	348.475	444.037	444.832	445.216	344.364	444.695	1.29135	8.06306e-05
205162_at	ERCC8 /// FLJ12595	584.266	599.391	586.996	770.409	745.887	767.416	590.218	761.237	1.28976	2.27639e-05
34260_at	TELO2	1119.33	1124.97	1134.29	891.057	860.798	868.16	1126.19	873.338	0.775478	7.56036e-06
235143_at	SLC10A7	684.221	685.127	654.288	877.735	860.842	870.712	674.545	869.763	1.28941	3.2419e-05
219389_at	SUSD4	637.168	633.344	654.669	513.587	490.206	489.582	641.727	497.792	0.775706	7.52201e-05
201767_s_at	ELAC2	1722.2	1722.8	1671.19	1359.37	1283.23	1329.31	1705.4	1323.97	0.77634	8.38069e-05
242753_x_at	C4orf16	170.92	168.417	162.658	214.447	219.183	212.771	167.332	215.467	1.28766	5.08167e-05
225068_at	KLHL12	2158.91	2121.88	2177.05	2690.78	2815.43	2808.47	2152.61	2771.56	1.28753	7.13274e-05
220952_s_at	PLEKHA5	434.325	458.665	437.269	581.142	564.574	566.815	443.42	570.843	1.28737	8.08226e-05
227117_at	---	3812.18	3813.41	3731.74	4919.09	4772.13	4918.46	3785.78	4869.89	1.28637	2.07652e-05
201436_at	EIF4E /// LOC100131565 /// LOC100132918	1208.16	1211.84	1175.56	957.363	906.767	931.317	1198.52	931.816	0.777473	6.88777e-05
209838_at	COPS2	1156.3	1136.82	1159.06	914.056	904.377	866.764	1150.73	895.066	0.777827	4.52071e-05
228751_at	CLK4	433.493	449.159	429.318	558.203	572.335	555.097	437.323	561.878	1.28481	5.06272e-05
219336_s_at	ASCC1	1024.83	1050.81	1035.02	1298.11	1353.06	1342.11	1036.89	1331.09	1.28374	4.48623e-05
227246_at	PLRG1	849.847	818.877	840.068	1083.57	1070.21	1063.78	836.264	1072.52	1.28251	1.31095e-05
210783_x_at	CLEC11A	800.847	812.502	779.748	619.662	622.855	623.52	797.699	622.013	0.779758	2.68661e-05
221823_at	C5orf30	563.863	562.576	554.03	442.598	426.941	441.226	560.156	436.922	0.78	1.53221e-05
214484_s_at	OPRS1	764.205	773.984	792.102	614.012	593.529	612.017	776.764	606.519	0.780828	4.16184e-05
235987_at	PRKXP1	244.883	255.872	247.182	318.664	319.175	319.589	249.312	319.143	1.28009	1.57821e-05
224934_at	YIPF5	2774.97	2813.21	2817.13	3573.51	3607.08	3575.42	2801.77	3585.34	1.27967	7.10435e-07
210983_s_at	MCM7	3969.27	3980.59	3897.03	3190.18	3015.97	3052.82	3948.97	3086.32	0.781553	6.4146e-05
200977_s_at	TAX1BP1	2310.63	2358.46	2411.59	3067.74	3037.19	2953.68	2360.23	3019.54	1.27934	6.23475e-05
213248_at	LOC730101	291.562	290.842	294.853	375.388	368.092	378.201	292.419	373.894	1.27862	7.567e-06
214427_at	NOL1	2441.05	2353.49	2375.35	1898.67	1862.81	1846.47	2389.96	1869.32	0.782153	3.45216e-05
212305_s_at	MIA3	345.229	340.449	347.688	439.906	441.694	439.334	344.456	440.311	1.27828	8.92548e-07
221606_s_at	NSBP1	1221.56	1175.91	1189.44	1515.65	1563.5	1503.97	1195.64	1527.7	1.27773	6.34351e-05
202097_at	NUP153	4513.61	4519.45	4429.71	3547.11	3437.71	3557.46	4487.59	3514.09	0.783069	1.75082e-05
203791_at	DMXL1	645.91	669.849	653.418	836.472	857.853	820.329	656.392	838.218	1.27701	7.49766e-05
223276_at	MST150	900.166	918.199	919.669	1159.9	1159.44	1176.15	912.678	1165.16	1.27664	3.53896e-06
229017_s_at	RIPK5	356.576	369.187	353.686	452.054	464.054	461.315	359.816	459.141	1.27604	3.86321e-05
219408_at	PRMT7	657.282	656.076	680.244	530.641	510.278	521.629	664.534	520.849	0.783781	6.35883e-05
235347_at	LRCH3	654.878	664.556	635.712	810.267	840.583	842.269	651.715	831.039	1.27516	9.05326e-05
203882_at	IRF9	430.249	449.336	423.792	554.609	549.585	557.812	434.459	554.002	1.27515	5.93858e-05
212565_at	STK38L	732.89	769.865	743.356	972.874	941.668	948.257	748.703	954.266	1.27456	7.25472e-05
205036_at	LSM6	3341.37	3292.77	3449.63	2694.23	2619.06	2599.32	3361.26	2637.54	0.784688	9.38711e-05
241937_s_at	WDR4	2517.96	2525.17	2523.83	1973.29	1996.07	1969.63	2522.32	1979.67	0.784858	1.85694e-07
204514_at	DPH2	1204.14	1232.9	1231.26	994.308	934.317	952.703	1222.77	960.443	0.785468	9.84297e-05
228252_at	PIF1	455.494	460.899	437.118	567.028	577.269	578.792	451.17	574.363	1.27305	5.42198e-05
243643_x_at	---	295.951	297.734	292.978	382.07	375.273	370.772	295.554	376.039	1.27232	1.13956e-05
218728_s_at	CNIH4	2858.52	2813.27	2736.8	3494.76	3570.89	3630.36	2802.86	3565.34	1.27203	6.74864e-05
213132_s_at	MCAT	1475.68	1465.53	1516.17	1168.7	1157.81	1178.36	1485.79	1168.29	0.786307	2.18482e-05
224880_at	RALA	3742.34	3708.6	3673.52	4633.97	4692.65	4816.15	3708.15	4714.26	1.27132	3.07819e-05
202613_at	CTPS	3444.4	3415.82	3430.45	2747.08	2682.07	2672.82	3430.22	2700.66	0.787312	3.96114e-06
235022_at	C18orf19	949.174	935.22	927.228	744.005	756.636	714.9	937.207	738.514	0.787994	7.00012e-05
219279_at	DOCK10	826.276	846.91	842.008	1057.98	1050.94	1082.01	838.398	1063.64	1.26866	1.85554e-05
226990_at	CAPRIN1	1436.07	1407.24	1376.52	1132.46	1084.31	1113.85	1406.61	1110.21	0.789279	9.06928e-05
225712_at	GEMIN5	1213.99	1223.01	1270.41	993.75	967.26	965.393	1235.8	975.468	0.789339	9.56662e-05
212310_at	MIA3	282.462	295.8	282.236	362.282	369.304	357.878	286.833	363.155	1.26609	8.29534e-05
241792_x_at	---	1142.08	1102.56	1108.4	901.264	890.864	861.547	1117.68	884.558	0.791423	8.41994e-05
212563_at	BOP1	1561.28	1555.31	1531.55	1267.45	1205.96	1208.84	1549.38	1227.42	0.792197	6.33479e-05
201027_s_at	EIF5B	1365.61	1342.46	1350.03	1073.27	1058.81	1083.47	1352.7	1071.85	0.792382	4.55757e-06
203201_at	PMM2	1431.55	1442.81	1468.17	1128.98	1175.92	1136.91	1447.51	1147.27	0.792582	3.87097e-05
217834_s_at	SYNCRIP	2376.2	2305.36	2286.83	1861.93	1865.3	1796.43	2322.8	1841.22	0.792674	8.33364e-05
224959_at	SLC26A2	1930.02	1893.86	1928.08	2419.8	2397.19	2438.67	1917.32	2418.55	1.26142	3.74163e-06
200843_s_at	EPRS	2089.67	2124.52	2207.37	2684.92	2687.17	2722.06	2140.52	2698.05	1.26047	5.60361e-05
202561_at	TNKS	1221.57	1255.38	1217.39	1535.1	1550.85	1569.88	1231.45	1551.95	1.26026	1.6905e-05
225251_at	RAB24	699.562	739.852	721.447	896.992	915.711	910.152	720.287	907.618	1.26008	6.538e-05
221989_at	RPL10	1118.02	1118.9	1126.71	922.573	871.967	875.465	1121.21	890.002	0.793788	7.61221e-05
217940_s_at	CARKD	1140.45	1165.45	1182.5	1461.89	1471.54	1459.45	1162.8	1464.29	1.25928	9.49556e-06
224983_at	SCARB2	816.396	802.951	841.418	1041.78	1031.95	1024.54	820.255	1032.75	1.25906	3.32256e-05
213632_at	DHODH	498.655	504.138	518.069	412.012	393.501	402.964	506.954	402.826	0.794601	9.43153e-05
221688_s_at	IMP3	2205.66	2275.94	2246.7	1835.14	1759.88	1751.44	2242.77	1782.15	0.794623	8.12044e-05
210260_s_at	TNFAIP8	4285.67	4339	4267.31	5358.84	5485.54	5363.03	4297.33	5402.47	1.25717	9.52346e-06
232183_at	SERAC1	323.579	328.972	341.468	418.694	421.469	409.053	331.34	416.405	1.25673	9.83004e-05
208296_x_at	TNFAIP8	4212.66	4261.81	4269.74	5189.92	5434.36	5386.92	4248.07	5337.07	1.25635	7.23213e-05
1558700_s_at	ZNF260	1571.44	1511.42	1513.56	1918.92	1959.4	1894.78	1532.14	1924.37	1.256	6.75845e-05
221788_at	---	300.547	308.081	314.457	384.054	386.938	388.118	307.695	386.37	1.25569	2.38516e-05
220610_s_at	LRRFIP2	556.279	572.651	559.056	707.088	698.188	714.156	562.662	706.478	1.2556	1.52152e-05
239516_at	---	252.891	256.945	245.245	312.28	322.502	313.227	251.694	316.003	1.25551	8.49081e-05
213518_at	PRKCI	1006.96	984.525	995.579	1227.72	1253.52	1268.82	995.688	1250.02	1.25543	2.42691e-05
214681_at	GK	252.563	251.807	244.807	310.453	315.953	313.962	249.726	313.456	1.2552	1.35085e-05
207350_s_at	VAMP4	286.977	282.857	278.933	359.06	356.253	349.83	282.922	355.047	1.25493	1.80254e-05
226861_at	ASB8	1116.84	1113.53	1094.36	1367.78	1396.62	1407.36	1108.24	1390.59	1.25477	1.65522e-05
209240_at	OGT	5332.26	5341.02	5384.91	6717.31	6784.18	6647.25	5352.73	6716.25	1.25473	2.88102e-06
213932_x_at	HLA-A	3327.21	3397.69	3363.7	4332.76	4151.15	4173.34	3362.87	4219.09	1.25461	7.33462e-05
209341_s_at	IKBKB	1123.05	1132.43	1136	1408.76	1417.09	1427.07	1130.5	1417.64	1.254	8.10149e-07
220761_s_at	TAOK3	1936.85	1917.11	1895.34	2379.93	2471.22	2357.12	1916.43	2402.76	1.25377	9.53292e-05
212846_at	RRP1B	6021.73	5993.02	5834.57	4818.74	4749.72	4679.67	5949.77	4749.38	0.798245	3.52772e-05
202741_at	PRKACB	1737.02	1714.58	1727.31	2196.65	2112.67	2178.33	1726.3	2162.55	1.2527	3.87481e-05
222537_s_at	CDC42SE1	562.984	571.971	567.777	702.838	721.567	708.357	567.577	710.921	1.25255	9.93124e-06
223577_x_at	MALAT1	215.345	211.166	205.883	262.51	262.234	267.334	210.798	264.026	1.25251	3.8238e-05
225655_at	UHRF1	10376.5	10263.9	10409.7	8236.08	8431.4	8131.97	10350	8266.48	0.798694	1.46064e-05
213000_at	MORC3	1813.83	1850.66	1788.14	2251.14	2286.87	2288.77	1817.54	2275.6	1.25202	1.53999e-05
214578_s_at	ROCK1	1263.34	1325.82	1295.56	1591.17	1640.27	1631.91	1294.91	1621.12	1.25192	7.89735e-05
201637_s_at	FXR1	3741.5	3854.15	3645.98	4625.99	4755.6	4682.71	3747.21	4688.1	1.25109	9.31621e-05
212111_at	STX12	965.841	982.163	1022.55	1242.86	1251.42	1221.52	990.185	1238.6	1.25088	9.99084e-05
205224_at	SURF2	2091.21	2043.83	2078.45	1689.46	1676.01	1608.63	2071.16	1658.03	0.800532	6.7986e-05
1552733_at	KLHDC1	181.88	184.968	181.533	230.951	226.542	227.451	182.793	228.315	1.24903	6.21935e-06
202846_s_at	RALBP1	970.037	936.621	940.649	1172.47	1197.53	1184.7	949.102	1184.9	1.24844	2.53697e-05
228220_at	FCHO2	133.025	136.041	128.958	168.309	164.258	163.845	132.675	165.471	1.24719	9.71783e-05
212479_s_at	RMND5A	840.482	849.397	836.315	1064.13	1055.7	1029.26	842.065	1049.69	1.24657	2.48238e-05
223250_at	KLHL7	2079.54	2044.96	1962.57	2536.28	2552.11	2499.07	2029.02	2529.15	1.24649	9.71309e-05
207631_at	NBR2	329.143	322.152	325.954	405.931	405.721	405.781	325.75	405.811	1.24578	1.2142e-06
215493_x_at	BTN2A1	1015.58	972.847	978.964	1208.36	1242.36	1245.45	989.13	1232.06	1.2456	8.469e-05
211501_s_at	EIF3B	3700.99	3694.61	3699.92	3027.3	3010.57	2878.74	3698.51	2972.2	0.803623	5.12655e-05
2028_s_at	SFRS3	517.145	513.456	527.635	428.397	417.882	405.957	519.412	417.412	0.803624	9.62339e-05
224832_at	DUSP16	239.881	245.224	248.456	301.038	304.965	306.718	244.52	304.24	1.24423	1.90879e-05
214764_at	RRP15	905.184	913.837	892.494	743.45	711.746	724.896	903.838	726.697	0.804012	4.49058e-05
217122_s_at	RP11-345P4.4 /// SLC35E2	4562.92	4623.62	4542.05	5674.77	5634.32	5753.22	4576.2	5687.44	1.24283	6.43145e-06
225278_at	PRKAB2	722.796	751.676	730.222	931.972	911.187	896.599	734.898	913.253	1.24269	9.28496e-05
222286_at	SNAPC3	215.336	218.527	221.982	271.026	277.699	265.876	218.615	271.534	1.24206	8.74434e-05
227115_at	---	345.779	348.197	354.382	283.715	274.787	285.794	349.453	281.432	0.80535	4.40679e-05
235119_at	TAF3	1071.34	1099.03	1138.76	1365.73	1373.97	1368.94	1103.04	1369.55	1.24161	8.66433e-05
211068_x_at	FAM21C /// FAM21D	1395.28	1343.08	1375.91	1716.95	1696.29	1694.33	1371.42	1702.52	1.24143	1.98388e-05
201745_at	TWF1	1763.88	1690.5	1693.47	1382.37	1387.2	1377.79	1715.95	1382.45	0.805648	7.94504e-05
243338_at	FREM3	338.657	345.2	339.675	418.181	424.124	427.417	341.178	423.241	1.24053	8.55351e-06
200854_at	NCOR1	2355.83	2323.33	2274.84	2848.3	2835.36	2935.4	2318	2873.02	1.23944	7.25957e-05
1559535_s_at	---	142.33	143.279	141.676	172.33	179.925	177.29	142.428	176.515	1.23933	5.77495e-05
221895_at	MOSPD2	645.221	635.406	632.688	781.161	801.078	788.778	637.771	790.339	1.23922	1.26646e-05
204493_at	BID	1819.39	1835.77	1874.52	1520.03	1454.65	1488.01	1843.23	1487.56	0.807043	7.05565e-05
217393_x_at	UBE2NL	1144.69	1138.93	1142.89	945.909	926.789	892.649	1142.17	921.783	0.807044	7.41549e-05
212902_at	SEC24A	286.125	284.812	288.421	345.224	359.16	360.343	286.452	354.909	1.23898	8.03511e-05
218156_s_at	TSR1	2294.12	2215.22	2289.33	1833.44	1831.34	1823.19	2266.22	1829.32	0.807213	3.5272e-05
222984_at	PAIP2	5770.19	5608.27	5732.11	7039.87	7006.54	7139.64	5703.52	7062.02	1.23818	1.38105e-05
227700_x_at	ATAD3A	1217.27	1176.93	1180.55	968.533	962.959	957.453	1191.59	962.982	0.808152	3.33813e-05
201200_at	CREG1	1996.43	2007.31	1994.55	2407.78	2516.78	2492.11	1999.43	2472.22	1.23646	7.09103e-05
223327_x_at	FLJ22795 /// LOC727751 /// LOC727849	586.468	599.707	603.98	745.969	745.836	721.456	596.718	737.754	1.23635	6.52021e-05
235171_at	---	1305.56	1309.3	1336.33	1625.25	1593.13	1665.14	1317.06	1627.84	1.23596	8.64134e-05
225868_at	TRIM47	349.613	352.506	359.685	293.475	280.468	285.641	353.935	286.528	0.809551	7.60157e-05
204127_at	RFC3	4084.07	4031.87	4016.68	3251.87	3368.82	3206.12	4044.2	3275.6	0.809949	6.36377e-05
226909_at	ZNF518B	1510.92	1572.16	1484.22	1883.57	1873.41	1879.15	1522.43	1878.71	1.23402	8.46001e-05
216944_s_at	ITPR1	320.105	318.668	326.772	400.74	392.837	397.797	321.848	397.125	1.23389	1.22969e-05
204087_s_at	SLC5A6	1097.97	1097.42	1134.31	903.994	884.141	911.389	1109.9	899.841	0.810741	6.90434e-05
222604_at	GTF3C3	987.929	972.745	999.595	1184.86	1234.32	1229.17	986.756	1216.12	1.23244	9.82214e-05
221736_at	KIAA1219	1026.57	1030.95	998.063	1227.45	1273.37	1258.37	1018.53	1253.06	1.23027	8.00113e-05
214670_at	ZKSCAN1	1021.93	1047.85	1045.84	1278.86	1278.58	1275.34	1038.54	1277.6	1.23018	4.53575e-06
215030_at	GRSF1	2002.91	1993.84	1979.83	1667.75	1572.33	1618.3	1992.19	1619.46	0.812904	9.67223e-05
218795_at	ACP6	453.819	465.714	460.887	567.954	559.423	569.102	460.14	565.493	1.22896	1.08589e-05
226155_at	FAM160B1	2028.62	2008.56	2020.88	2484.78	2470.84	2489.28	2019.35	2481.63	1.22892	2.76673e-07
228920_at	ZNF260	1441.24	1497.39	1447.23	1783.31	1800.14	1806.19	1461.95	1796.55	1.22887	3.09859e-05
213269_at	ZNF248	494.086	505.455	484.16	614.343	606.242	601.507	494.567	607.364	1.22807	4.85789e-05
1553974_at	C22orf39	1725.96	1749.68	1707.67	2102.94	2128.11	2128.85	1727.77	2119.96	1.227	6.10031e-06
225217_s_at	BRPF3	384.719	389.812	398.798	480.233	479.159	480.123	391.11	479.838	1.22686	1.3877e-05
209372_x_at	TUBB2A /// TUBB2B	461.625	464.826	459.474	386.261	370.816	372.645	461.975	376.574	0.815139	3.76806e-05
225927_at	MAP3K1	554.582	555.977	563.453	697.332	668.166	687.626	558.004	684.375	1.22647	7.48537e-05
222036_s_at	MCM4	4211.71	4225.73	4166.86	3430.31	3481.42	3375.74	4201.43	3429.15	0.816187	1.29168e-05
217725_x_at	SERBP1	4559.15	4512.81	4550.35	3749.02	3645.68	3725.27	4540.77	3706.65	0.816305	8.51117e-06
38157_at	DOM3Z	590.225	579.727	587.36	715.564	733.815	702.415	585.77	717.265	1.22448	8.32338e-05
214426_x_at	CHAF1A	2746.65	2735.12	2688.98	2216.16	2277.56	2183.15	2723.58	2225.62	0.817167	5.48497e-05
222316_at	---	138.001	140.774	143.941	171.624	171.66	173.793	140.905	172.359	1.22323	3.58237e-05
221907_at	C14orf172	1302.88	1265.8	1259.12	1039.64	1051.2	1041.03	1275.93	1043.96	0.81819	3.98665e-05
218487_at	ALAD	908.55	912.863	932.949	1100.63	1139.91	1124.19	918.121	1121.57	1.2216	5.9318e-05
200730_s_at	PTP4A1	1575.95	1578.22	1590.06	1293.4	1291.68	1299.22	1581.41	1294.77	0.818742	2.62377e-07
222307_at	LOC282997	195.669	200.794	199.488	243.539	237.033	247.018	198.65	242.53	1.22089	9.30769e-05
226737_at	SLC25A42	436.815	425.98	429.687	518.286	526.27	532.786	430.827	525.781	1.2204	2.77217e-05
235566_at	TMF1	337.154	337.437	326.566	413.98	405.807	401.892	333.719	407.226	1.22027	6.46592e-05
207332_s_at	TFRC	12370.1	12246.3	12681.8	10350.4	10145.2	10074.6	12432.7	10190	0.819616	6.41959e-05
209168_at	GPM6B	253.245	252.034	249.001	200.462	210.982	206.834	251.427	206.093	0.819693	8.22539e-05
226371_at	JARID1A	783.842	794.256	787.915	959.356	974.249	952.682	788.671	962.096	1.2199	8.14115e-06
204775_at	CHAF1B	1168.52	1196.29	1200.26	964.973	998.085	959.88	1188.36	974.313	0.819883	8.15941e-05
226519_s_at	AGXT2L2	354.096	365.844	363.196	440.241	440.513	439.847	361.045	440.2	1.21924	1.21554e-05
229638_at	IRX3	2466.1	2465.48	2448.47	2036.74	1981.99	2036.52	2460.02	2018.42	0.820489	1.03888e-05
210346_s_at	CLK4	795.808	816.085	799.194	967.218	993.249	977.026	803.696	979.164	1.21833	2.91257e-05
201932_at	LRRC41	768.524	781.715	804.093	968.76	950.832	947.933	784.777	955.842	1.21798	7.63972e-05
201478_s_at	DKC1	5605.7	5618.58	5580.83	4751.98	4525.64	4523.14	5601.7	4600.25	0.821224	9.91527e-05
212738_at	ARHGAP19	2951.06	2999.09	2903.09	3575.59	3614.65	3586.02	2951.08	3592.09	1.21721	1.43213e-05
225734_at	FBXO22	1386.88	1382.32	1350.67	1656.76	1685.18	1671.79	1373.29	1671.24	1.21696	1.45676e-05
212919_at	DCP2	3608.85	3657.74	3682.76	4370.85	4473.13	4478.07	3649.78	4440.68	1.2167	2.15674e-05
221931_s_at	SEH1L	5426.25	5368.37	5243.45	4418.57	4393.55	4371.42	5346.02	4394.51	0.822015	3.42723e-05
236192_at	---	491.715	512.838	501.713	614.471	605.357	612.442	502.089	610.757	1.21643	4.21991e-05
202081_at	IER2	3093.01	3175.55	3150.34	2636.58	2521.74	2585.23	3139.63	2581.18	0.822129	8.59511e-05
235348_at	ABHD13	580.43	607.733	596.796	721.856	725.368	723.845	594.986	723.69	1.21631	4.36168e-05
202705_at	CCNB2	3751.2	3857.31	3874.02	4661.32	4711.74	4585.4	3827.51	4652.82	1.21563	5.02903e-05
202677_at	RASA1	1793.01	1870.32	1807.77	2228.73	2209.07	2207.09	1823.7	2214.97	1.21454	4.62819e-05
216236_s_at	SLC2A14 /// SLC2A3	276.243	274.78	270.909	337.129	330.648	328.694	273.977	332.157	1.21235	2.09799e-05
1561638_at	---	198.724	193.676	195.276	162.071	160.624	162.204	195.892	161.633	0.825113	1.31457e-05
1556236_at	---	150.382	153.965	151.346	182.247	184.714	185.139	151.898	184.033	1.21156	1.06562e-05
218626_at	EIF4ENIF1	1231.98	1256.43	1246.92	1042.37	1017.3	1025.17	1245.11	1028.28	0.825853	1.48616e-05
217806_s_at	POLDIP2	1616.61	1594.21	1628.67	1359.76	1311.92	1325.06	1613.16	1332.25	0.825861	4.38445e-05
217724_at	SERBP1	9631.16	9889.6	9807.92	8237.34	8056.47	7930.5	9776.23	8074.77	0.82596	6.55533e-05
222416_at	ALDH18A1	4000.52	3994.8	3904.69	3357.37	3262.63	3221.58	3966.67	3280.53	0.827023	8.6883e-05
200733_s_at	PTP4A1	3772.65	3716.19	3817.53	3139.32	3109.02	3103.87	3768.79	3117.41	0.827164	1.58223e-05
205340_at	ZBTB24	1567.87	1605.6	1604.34	1302.64	1304.22	1346.82	1592.6	1317.89	0.827509	6.70395e-05
228235_at	MGC16121	237.616	225.754	232.088	281.591	280.062	277.156	231.819	279.603	1.20612	9.99171e-05
225221_at	---	2591.46	2620.41	2565.14	3135.43	3143.54	3098.34	2592.33	3125.77	1.20577	7.37122e-06
1568646_x_at	ZNF208	100.73	97.7927	97.4634	118.665	119.336	118.857	98.6621	118.952	1.20565	2.17346e-05
203378_at	PCF11	1132.98	1111.47	1115.55	946.336	934.292	906.656	1120	929.095	0.829549	7.19912e-05
1552739_s_at	ST7L	233.353	230.448	231.496	278.01	283.095	276.913	231.765	279.339	1.20527	1.09318e-05
231929_at	IKZF2	2826.78	2925.17	2824.7	3453.24	3482.41	3400.28	2858.89	3445.31	1.20512	6.90481e-05
226216_at	INSR	319.809	329.255	331.856	392.801	396.961	392.085	326.973	393.949	1.20484	3.59329e-05
241435_at	---	407.496	405.985	392.667	483.382	478.203	491.447	402.049	484.344	1.20469	8.65834e-05
202329_at	CSK	2557.91	2555.93	2519.35	2123.08	2140.86	2073.33	2544.4	2112.42	0.830225	2.70137e-05
225321_s_at	PILRB	1541.24	1571.09	1572.11	1885.64	1882.57	1873.43	1561.48	1880.55	1.20434	3.86135e-06
227420_at	TNFAIP8L1	415.496	416.305	405.077	499.67	486.174	503.464	412.293	496.436	1.20409	9.49722e-05
201479_at	DKC1	7894.74	7930.47	7817.88	6714.11	6384.15	6540.89	7881.03	6546.38	0.83065	9.44293e-05
221769_at	SPSB3	273.069	272.716	267.93	326.724	329.568	323.317	271.238	326.536	1.20387	1.14506e-05
218263_s_at	ZBED5	2706.36	2673.34	2666.07	3267.62	3237.25	3172.66	2681.92	3225.85	1.20281	2.95078e-05
218346_s_at	SESN1	391.835	399.083	391.043	478.319	471.312	471.258	393.987	473.63	1.20214	1.06774e-05
218582_at	2011-03-05	1454.42	1451.49	1427.09	1724.86	1767.1	1712.58	1444.33	1734.84	1.20114	4.95349e-05
221738_at	KIAA1219	372.125	378.068	364.979	448.061	439.761	451.453	371.724	446.425	1.20096	6.49774e-05
220789_s_at	TBRG4	1296.49	1287.75	1273.92	1056.97	1064.44	1098.37	1286.06	1073.26	0.834535	5.99258e-05
212929_s_at	FAM21A /// FAM21B /// FAM21C /// FAM21D	1231.3	1178.39	1190.31	1423.97	1450.58	1436.84	1200	1437.13	1.19761	9.12161e-05
218176_at	MAGEF1	1154.95	1143.89	1116.97	1341.89	1370.96	1376.2	1138.6	1363.02	1.1971	6.65522e-05
222531_s_at	C14orf108	1518.43	1487.1	1497.42	1828.05	1776.68	1781.4	1500.98	1795.38	1.19613	4.86451e-05
222543_at	DERL1	1930.87	1953.21	1925.45	2297.51	2282.38	2361.78	1936.51	2313.89	1.19488	6.33671e-05
1564276_at	LOC441108	157.347	156.115	154.89	186.489	183.698	188.739	156.117	186.309	1.19339	2.44813e-05
229531_at	---	178.936	175.873	178.986	216.535	211.065	209.219	177.932	212.273	1.193	7.2263e-05
1558027_s_at	PRKAB2	304.593	297.018	299.441	365.648	354.076	354.9	300.351	358.208	1.19263	9.19696e-05
217732_s_at	ITM2B	5665.67	5568.72	5702.01	6682.2	6799.53	6699.49	5645.47	6727.08	1.19159	1.8385e-05
204164_at	SIPA1	357.435	364.103	363.634	300.826	305.755	304.124	361.724	303.568	0.839227	1.16825e-05
215136_s_at	EXOSC8	3623.48	3558.95	3561.49	4201.47	4318.17	4278.51	3581.31	4266.05	1.1912	3.49583e-05
217993_s_at	MAT2B	4155.28	4102.36	4148.84	4945.44	4893.81	4938.42	4135.49	4925.89	1.19113	2.22303e-06
218383_at	C14orf94	1753.54	1739.08	1764.11	2053.48	2092.66	2113.53	1752.24	2086.56	1.19079	3.089e-05
227871_at	CHM	1001.94	970.642	1015.58	1188.09	1184.1	1185.42	996.056	1185.87	1.19056	7.11472e-05
208820_at	PTK2	292.952	298.793	294.593	347.769	351.832	355.258	295.446	351.62	1.19013	1.76184e-05
221741_s_at	YTHDF1	3202.37	3273	3224.6	2776.01	2685.55	2693.78	3233.33	2718.44	0.840758	6.6572e-05
200715_x_at	RPL13A	9671.74	9615.85	9550.66	11433.5	11359.5	11479.8	9612.75	11424.3	1.18845	1.66456e-06
226583_at	FLJ40142	480.632	485.358	482.435	564.558	573.904	581.225	482.808	573.229	1.18728	2.78332e-05
241840_at	---	281.613	279.76	278.253	235.52	232.753	239.221	279.875	235.832	0.842631	1.55789e-05
218098_at	ARFGEF2	2564.05	2585.93	2591.36	2990.28	3104.72	3088.81	2580.45	3061.27	1.18633	9.85081e-05
221220_s_at	SCYL2	158.307	155.162	152.269	183.65	185.442	182.734	155.246	183.942	1.18484	5.79288e-05
203105_s_at	DNM1L	1093.15	1132.88	1143.3	1338.38	1324.72	1327.62	1123.11	1330.24	1.18443	9.85271e-05
203422_at	POLD1	1232.08	1229.93	1232.26	1046.28	1047.11	1025.68	1231.43	1039.69	0.844297	5.4335e-06
203166_at	CFDP1	3613.61	3687.09	3688.97	4297.94	4388.19	4327.46	3663.22	4337.86	1.18417	2.48068e-05
223365_at	DHX37	1220.92	1216.5	1182.33	1033.15	1012.11	1012.6	1206.58	1019.28	0.84477	9.09936e-05
214901_at	ZNF8	454.349	469.123	457.315	547.985	546.713	537.816	460.262	544.171	1.18231	5.50309e-05
222512_at	NUB1	1015.96	1034.08	1049.31	1237.87	1207.43	1216.32	1033.11	1220.54	1.18142	7.17628e-05
218132_s_at	TSEN34	1818.42	1805.92	1825.3	1529.28	1572.31	1511.24	1816.55	1537.61	0.846447	6.24199e-05
201607_at	PWP1	1049.87	1038.86	1072.82	906.909	886.48	889.506	1053.85	894.298	0.848605	8.82389e-05
225969_at	ALKBH6 /// C19orf46	636.224	613.993	634.298	743.353	737.27	739.047	628.172	739.89	1.17785	5.42342e-05
222148_s_at	RHOT1	2430.27	2418.4	2389.34	2802.7	2879.73	2842.22	2412.67	2841.55	1.17776	3.57476e-05
218803_at	CHFR	192.068	197.751	198.977	233.468	228.803	230.83	196.265	231.033	1.17715	8.00505e-05
239482_x_at	ZNF708	334.989	336.876	344.3	393.973	405.16	396.92	338.722	398.684	1.17703	8.33079e-05
224864_at	SRA1	1617.25	1656.65	1635.31	1909.57	1927.65	1940	1636.41	1925.74	1.17681	1.81671e-05
1552562_at	ZNF570	233.034	233.946	233.941	271.699	273.203	279.546	233.64	274.816	1.17623	3.51966e-05
227314_at	ITGA2	125.349	127.203	124.618	148.457	148.801	146.225	125.723	147.828	1.17582	1.91129e-05
225685_at	---	235.055	233.887	236.857	280.881	271.359	277.367	235.266	276.536	1.17542	7.18759e-05
228281_at	C11orf82	1174.22	1182.11	1144.05	999.802	994.984	983.989	1166.8	992.925	0.850984	7.76228e-05
213123_at	MFAP3	1404.56	1409.14	1412.09	1656.59	1678.04	1630.8	1408.6	1655.15	1.17503	2.91004e-05
211762_s_at	KPNA2 /// LOC728860	8642.59	8791.41	8681.24	7481.49	7481.83	7280.73	8705.08	7414.69	0.851765	4.41971e-05
228032_s_at	---	742.108	750.374	752.264	877.956	871.898	880.727	748.248	876.861	1.17188	2.97268e-06
201985_at	KIAA0196	1366.96	1425.34	1399.81	1637.6	1628.14	1640.93	1397.37	1635.56	1.17046	8.10982e-05
207509_s_at	LAIR2	183.885	181.103	184.068	213.556	210.547	217.207	183.019	213.77	1.16802	6.95777e-05
219556_at	C16orf59	850.824	841.819	852.251	734.448	709.359	736.042	848.298	726.616	0.856558	9.59191e-05
244038_at	WDR89	582.714	586.355	598.998	506.128	505.895	502.535	589.355	504.853	0.856619	3.7937e-05
224628_at	C2orf30	1695.98	1683.6	1691.98	2004.69	1950.48	1962.46	1690.52	1972.54	1.16683	3.725e-05
214760_at	ZNF337	684.103	695.152	681.198	587.237	582.732	597.304	686.818	589.091	0.857711	4.30131e-05
244024_at	ZNF182	345.968	355.595	347.019	404.367	405.005	412.699	349.527	407.357	1.16545	7.03905e-05
209323_at	PRKRIR	3118.76	3176.34	3119.81	2723.27	2650.45	2714.47	3138.3	2696.06	0.859084	6.00751e-05
220143_x_at	LUC7L	1716.52	1670.6	1712.3	1456.63	1474.12	1451.18	1699.8	1460.65	0.859302	6.13462e-05
238121_at	GK5	1027.91	1010.32	1018.16	1172.07	1193.56	1191.06	1018.8	1185.57	1.16369	1.97298e-05
217010_s_at	CDC25C	173.702	173.681	171.487	200.974	200.112	202.572	172.956	201.22	1.16341	5.23253e-06
209249_s_at	GHITM	4497.07	4420.77	4443.34	5226.84	5227.43	5087.55	4453.73	5180.61	1.16321	7.44772e-05
1553868_a_at	C5orf36	139.09	143.594	141.956	166.803	163.306	163.382	141.547	164.497	1.16214	9.75886e-05
203410_at	AP3M2	1140.25	1149.17	1116.56	1313.21	1324.91	1317.54	1135.33	1318.55	1.16139	2.9453e-05
221437_s_at	MRPS15	1774.54	1729.81	1755.94	1510.33	1521.96	1498.22	1753.43	1510.17	0.861266	3.87435e-05
224968_at	CCDC104	1053.63	1034.97	1040.85	1217.67	1207.96	1203.44	1043.15	1209.69	1.15965	8.87508e-06
229611_at	LMLN	401.021	390.106	397.568	455.413	456.245	464.185	396.232	458.614	1.15744	6.35592e-05
238833_at	LOC729088	161.219	160.293	160.658	183.942	188.11	185.999	160.724	186.017	1.15737	1.66724e-05
1558046_x_at	LOC441528	387.172	383.407	376.258	332.162	328.234	330.682	382.279	330.359	0.864183	5.35926e-05
201579_at	FAT	5916.46	5880.94	5881.89	6824.53	6706.37	6884.56	5893.1	6805.15	1.15477	3.5061e-05
222431_at	SPIN1	4253.42	4217.25	4318.64	4862.65	4931.71	4967.69	4263.1	4920.69	1.15425	5.22408e-05
1563772_a_at	LAMA3	251.081	250.75	253.147	219.294	215.127	219.954	251.659	218.125	0.866748	1.8891e-05
217226_s_at	SFXN3	372.057	382.5	377.368	434.185	440.713	430.134	377.308	435.011	1.15293	9.00912e-05
1554131_at	KIAA1128	108.304	107	105.839	121.543	123.965	124.738	107.048	123.415	1.1529	8.29328e-05
1564274_at	C9orf47	141.792	141.835	144.325	165.789	164.943	162.579	142.651	164.437	1.15273	3.43219e-05
222671_s_at	JMJD4	302.684	303.145	303.911	259.346	268.807	262.343	303.247	263.498	0.868924	7.29713e-05
203530_s_at	STX4	853.554	838.302	823.647	968.91	963.052	956.284	838.501	962.749	1.14818	9.35712e-05
1561602_at	LOC100129476	326.926	328.128	333.449	287.499	291.21	283.381	329.501	287.364	0.872118	7.666e-05
201800_s_at	OSBP	1737.76	1687.91	1683.38	1938.92	1953.7	1964.91	1703.01	1952.51	1.1465	9.66506e-05
211398_at	FGFR2	195.081	198.378	198.56	174.666	171.19	170.697	197.34	172.184	0.872526	5.85687e-05
210607_at	FLT3LG	190.656	195.331	193.039	168.309	166.857	170.052	193.009	168.406	0.87253	5.69014e-05
223368_s_at	METTL11A	2231.39	2194.17	2172.34	1942.48	1918.55	1901.77	2199.3	1920.93	0.87343	9.18196e-05
213960_at	NTRK3	189.538	189.844	187.381	167.03	166.629	161.966	188.921	165.208	0.874485	9.6049e-05
224634_at	GPATCH4	3938.17	3944.19	3997.99	3467.44	3473.67	3452.89	3960.12	3464.67	0.874891	7.85863e-06
204527_at	MYO5A	406.992	404.433	414.285	466.619	462.081	471.453	408.57	466.718	1.14232	6.53785e-05
212447_at	KBTBD2	1192.94	1208.84	1178.22	1377.53	1353.16	1349.01	1193.33	1359.9	1.13958	9.29202e-05
231557_at	---	209.65	209.726	206.892	180.585	184.319	184.825	208.756	183.243	0.877785	4.86535e-05
222731_at	ZDHHC2	1183.99	1171.74	1185.66	1339.4	1341.09	1353.43	1180.46	1344.64	1.13908	6.15418e-06
235903_at	ANKS6	567.033	561.001	571.716	503.284	499.457	489.567	566.583	497.436	0.877957	8.76605e-05
229113_s_at	C1orf86	836.034	830.409	838.185	743.619	724.989	733.438	834.876	734.016	0.879191	3.35087e-05
201581_at	TXNDC13	1584.81	1563.78	1610.25	1807.33	1807.81	1796.76	1586.28	1803.97	1.13723	4.87031e-05
212780_at	SOS1	428.822	421.019	419.977	481.171	479.512	481.345	423.273	480.676	1.13562	1.79717e-05
219063_at	C1orf35	969.481	962.77	976.91	858.752	848.503	858.717	969.72	855.324	0.882032	1.3839e-05
217781_s_at	ZFP106	1246.66	1226.42	1230.1	1384.87	1386	1414.25	1234.39	1395.04	1.13014	7.487e-05
225174_at	DNAJC10	2241.82	2268.66	2223.01	2506.1	2560.43	2538.02	2244.5	2534.85	1.12936	7.33981e-05
220992_s_at	C1orf25	995.33	977.234	977.113	1103.89	1115.91	1104.39	983.226	1108.06	1.12697	3.27114e-05
202829_s_at	MMP14	2035.6	2017.66	2057.33	2282.47	2316.38	2278.01	2036.86	2292.29	1.1254	5.30838e-05
37943_at	ZFYVE26	444.981	454.738	442.09	502.979	502.687	503.861	447.27	503.176	1.12499	6.48881e-05
201221_s_at	SNRP70	4579.31	4505.95	4551.25	4060.65	4000.94	4060.35	4545.5	4040.65	0.888933	3.27081e-05
225925_s_at	USP48	1131.56	1152.69	1160.85	1298.93	1285.78	1289.04	1148.37	1291.25	1.12443	5.88937e-05
203024_s_at	C5orf15	2891.92	2897.89	2967.72	3277.48	3260.29	3305.96	2919.18	3281.24	1.12403	9.94225e-05
1563132_at	---	153.812	155.304	152.089	136.708	136.256	137.376	153.735	136.78	0.889714	3.33062e-05
201330_at	RARS	3918.88	3943.83	3978.62	3543.38	3534.01	3464.3	3947.11	3513.9	0.890245	7.01633e-05
227286_at	INO80E	1238.43	1242.77	1224.57	1110.9	1098.04	1091.72	1235.26	1100.22	0.890678	3.38823e-05
234376_at	MYCN	186.718	188.601	186.777	168.516	167.967	165.099	187.365	167.194	0.892342	4.00301e-05
1554805_at	CLDN19	252.982	249.298	254.483	225.78	227.24	222.585	252.254	225.202	0.892757	9.79239e-05
226236_at	LOC388789	2288.14	2336.56	2312.74	2574.5	2583.04	2608.56	2312.48	2588.7	1.11945	4.5225e-05
225753_at	ZNF513	273.908	269.382	270.364	305.307	301.377	304.085	271.218	303.59	1.11936	2.80547e-05
213070_at	PIK3C2A	1660.91	1664.57	1643.59	1842.44	1865.8	1853.5	1656.36	1853.92	1.11927	1.48179e-05
200882_s_at	PSMD4	4578.55	4566.6	4614.5	5137.36	5129.73	5117.09	4586.55	5128.06	1.11806	2.03423e-06
221677_s_at	DONSON	1822.21	1791.31	1819.55	1616.41	1638.34	1622.49	1811.02	1625.75	0.897695	4.88907e-05
1559528_at	LOC100129917	125.385	126.769	125.503	139.994	140.941	139.704	125.886	140.213	1.11381	7.93118e-06
212917_x_at	RECQL	1038.25	1042.58	1048.84	1159.95	1173.52	1152.05	1043.22	1161.84	1.11371	3.52004e-05
226323_at	ZNF830	1417.41	1427.06	1446.96	1592.03	1579.31	1607.81	1430.47	1593.05	1.11365	8.5469e-05
202610_s_at	MED14	2072.24	2067.19	2072.38	2321.52	2312.11	2280.14	2070.61	2304.59	1.113	2.50544e-05
208910_s_at	C1QBP	12362.6	12343.3	12228.6	11112.6	11072.6	11020.4	12311.5	11068.5	0.89904	7.53585e-06
225384_at	DOCK7	1111.68	1092.01	1120.15	1228.35	1230.93	1233.4	1107.95	1230.89	1.11096	6.52292e-05
200023_s_at	EIF3F	10039.2	10099.6	10147.4	11252.2	11050.9	11291.3	10095.4	11198.1	1.10923	8.34281e-05
217846_at	QARS	4505.11	4564.26	4509.37	5067.21	4988.91	5005.35	4526.25	5020.49	1.1092	4.24844e-05
215841_at	GUCA1B	307.387	305.229	309.967	277.003	276.816	279.955	307.527	277.924	0.903739	3.23389e-05
213235_at	C16orf88	441.224	444.394	437.409	396.34	397.858	402.335	441.009	398.844	0.90439	4.94247e-05
205784_x_at	ARVCF	375.723	375.999	370.502	341.063	337.381	336.71	374.075	338.385	0.904591	4.55433e-05
222872_x_at	OBFC2A	627.967	631.338	626.059	567.531	573.654	564.869	628.454	568.685	0.904894	1.93261e-05
40420_at	STK10	433.445	431.43	432.867	472.485	474.74	483.296	432.581	476.84	1.10232	9.44568e-05
240766_at	IL23A	214.649	213.993	214.727	196.302	193.245	194.95	214.456	194.832	0.908496	1.39497e-05
212544_at	ZNHIT3	3509.05	3546.23	3541.29	3909.78	3885.4	3858.07	3532.19	3884.41	1.09972	2.46399e-05
210610_at	CEACAM1	228.726	229.359	230.404	209.714	209.505	208.812	229.497	209.344	0.912187	1.77825e-06
212364_at	MYO1B	1704.56	1715.43	1690.75	1858.05	1872.59	1867.03	1703.58	1865.89	1.09528	2.02159e-05
244682_at	CAMSAP1	159.77	160.328	159.262	147.736	145.629	144.466	159.787	145.943	0.913362	8.05746e-05
223047_at	CMTM6	2896.05	2853.73	2898.72	3175.43	3160.54	3126.2	2882.83	3154.06	1.09408	9.6261e-05
218068_s_at	ZNF672	870.678	869.855	860.957	793.256	796.262	789.795	867.163	793.105	0.914597	1.70432e-05
1554052_at	CNOT1	360.808	363.899	363.73	396.478	393.749	397.786	362.812	396.004	1.09149	1.42846e-05
220579_at	FLJ14100	163.185	163.328	163.434	150.232	151.328	148.081	163.316	149.88	0.917732	7.44886e-05
225472_at	BAT4	2291.82	2289.42	2307.59	2489.1	2491.77	2513.59	2296.28	2498.15	1.08792	1.52681e-05
227482_at	ADCK1	434.628	428.932	435.737	399.057	402.373	402.603	433.099	401.345	0.926681	9.41419e-05
242207_at	LOC100128361	337.381	334.877	336.328	309.678	313.741	311.238	336.195	311.553	0.926702	2.96017e-05
215230_x_at	EIF3C /// EIF3CL	8493.74	8645.11	8568.31	9292.11	9206.63	9234.05	8569.06	9244.26	1.0788	9.00682e-05
225720_at	SYNPO2	132.283	132.839	133.511	142.97	143.588	143.16	132.878	143.239	1.07798	6.55142e-06
201592_at	EIF3H	8412.84	8318.03	8386.28	8994.87	9001.76	9053.05	8372.38	9016.56	1.07694	2.20042e-05
200647_x_at	EIF3C /// EIF3CL	8321.89	8447.51	8449.77	8975.95	8993.57	8957.35	8406.39	8975.62	1.06771	9.8712e-05
214934_at	ATP9B	510.543	514.046	517.277	546.518	550.143	548.134	513.955	548.265	1.06676	5.01587e-05
237432_at	---	181.178	178.522	179.86	168.696	169.127	168.257	179.853	168.693	0.937949	7.91407e-05
229928_at	---	205.913	206.804	205.883	219.861	220.519	217.485	206.2	219.288	1.06347	8.71361e-05
233530_at	---	160.294	160.411	161.877	171.085	169.975	169.673	160.861	170.245	1.05833	7.36619e-05
207534_at	MAGEB1	172.583	172.596	171.604	163.691	162.644	162.363	172.261	162.899	0.945653	2.81282e-05
212734_x_at	RPL13	17983.8	18071.4	17986.3	18878.8	18832.7	19000.4	18013.8	18904	1.04941	5.16193e-05
211061_s_at	MGAT2	1079.29	1079.52	1077.08	1133.07	1123.71	1130.29	1078.63	1129.03	1.04672	3.14546e-05
211927_x_at	EEF1G	17661.8	17715.4	17731.4	18445.9	18612.2	18449.5	17702.9	18502.5	1.04517	8.43761e-05
221072_at	C9orf31	180.462	179.84	179.175	174.564	174.656	174.936	179.826	174.719	0.971602	9.64465e-05

## Sheet: P_min_0.0001_top50FC
Data S1. Microarray data including top 50 differentially expressed genes under NFV treatment.
Name	Description	DMSO1_2	DMSO2_2	DMSO_3	NELFINAVIR_1	NELFINAVIR_2	NELFINAVIR_3
203395_s_at	HES1	1001.6	1013.14	983.857	314.498	263.723	262.481
225295_at	SLC39A10	1044.61	1062.54	1080.58	513.584	369.003	426.449
240546_at	LOC389043	1133.97	1139.61	1089.46	557.005	418.906	488.321
227347_x_at	HES4	2585.32	2798.43	2772.13	1403.16	1100.82	1207.71
227336_at	DTX1	2966.34	2873.35	2822.84	1335.56	1396	1308.47
225344_at	NCOA7	1442.32	1487.59	1452.74	3014.42	3281.77	3094.44
205194_at	PSPH	1173.96	1162.65	1064.52	2376.31	2654.61	2527.84
213672_at	MARS	378.439	387.851	364.318	818.015	866.865	869.638
203640_at	MBNL2	939.84	944.159	848.849	1953.42	2158.49	2099.67
202731_at	PDCD4	584.754	535.087	553.067	1203.8	1345	1294.72
1553972_a_at	CBS	809.812	848.033	894.383	1914.06	1989.28	1988.2
212593_s_at	PDCD4	1089.5	1070.35	1036.65	2330.44	2688.31	2449.36
204674_at	LRMP	859.56	864.399	806.351	1884.97	2080.71	1965.15
211559_s_at	CCNG2	207.713	228.642	216.858	522.078	485.122	525.819
201656_at	ITGA6	578.461	556.061	556.037	1307.23	1294.78	1381.14
223062_s_at	PSAT1	5396.02	5307.76	5392.88	12114.5	13114.9	13151.5
232689_at	LOC284561	215.459	214.548	215.808	524.157	477.32	547.047
202402_s_at	CARS	835.861	830.619	864.469	1963.14	2074.96	2048.91
210279_at	GPR18	221.112	238.497	212.633	530.033	534.391	556.024
35974_at	LRMP	642.491	648.417	568.347	1413.6	1593.48	1496.46
232231_at	RUNX2	635.745	652.471	708.396	1496.16	1700.47	1709.89
204411_at	KIF21B	740.287	750.097	689.886	1749.19	1799.51	1828.46
227755_at	---	555.924	577.763	523.246	1295.96	1482.48	1344.28
203140_at	BCL6	218.816	228.035	226.626	538.587	578.09	559.238
207076_s_at	ASS1	529.425	569.039	536.227	1286.87	1368.61	1420.32
238695_s_at	RAB39B	273.703	294.89	289.041	722.848	789.067	687.531
217168_s_at	HERPUD1	1602.6	1646.32	1643.99	4267.53	4510.9	4509.93
201560_at	CLIC4	1672.85	1688.4	1612.17	4286.95	4910.88	4514.94
204774_at	EVI2A /// EVI2B	234.873	240.179	218.626	639.117	660.905	666.989
230075_at	RAB39B	481.085	523.6	492.733	1311.82	1493.93	1446.51
202769_at	CCNG2	1507.67	1453.45	1241.45	4027.86	4212.64	4325.57
202770_s_at	CCNG2	649.53	670.685	553.721	1815.86	1876.17	1922.74
231894_at	---	364.956	359.869	348.43	1038.32	1197.7	1125.11
223059_s_at	FAM107B	774.373	830.265	723.982	2405.28	2464.61	2592.19
224839_s_at	GPT2	205.614	221.314	211.719	686.763	736.48	758.566
223058_at	FAM107B	1121.96	1131.84	1020.13	3621.18	3911.17	3870.37
210512_s_at	VEGFA	695.748	693.025	554.92	2137.96	2466.62	2356.44
220892_s_at	PSAT1	882.975	846.719	912.805	3328.5	3405.92	3356.98
231124_x_at	LY9	334.948	330.341	331.535	1288.04	1338.02	1373.29
219892_at	TM6SF1	218.695	228.79	241.253	941.996	1048.72	1047.65
205047_s_at	ASNS	1277.88	1282.72	1363.87	5610.59	6322.16	6269.8
209822_s_at	VLDLR	290.423	306.73	293.007	1429.91	1365.9	1493.44
202847_at	PIGC	559.778	555.363	568.732	2523.25	2821.45	2812.68
226267_at	JDP2	340.724	324.076	300.933	1562.91	1617.07	1609.9
203439_s_at	STC2	189.191	181.998	176.917	867.22	999.094	973.112
203438_at	STC2	260.196	231.504	229.857	1315.16	1385.01	1489.41
219270_at	CHAC1	221.766	209.044	195.283	1371.23	1359.01	1358.07
217678_at	SLC7A11	463.891	477.864	469.62	3534.07	3149.39	3211.3
223196_s_at	SESN2	290.383	283.691	285.917	1930.88	2210.4	2055.4
209921_at	SLC7A11	654.258	690.037	694.149	5370.27	5273.36	5178.17
